# Supplementary material for: Perturbations in Gut Microbiota Composition in Psychiatric Disorders: A Review and Meta-analysis
Source: PubMed Central journal article supplement (PMC8444066; doi:10.1001/jamapsychiatry.2021.2573), 2021-09-15
Supplement: jamapsychiatry-e212573-s001.pdf [file jamapsychiatry-e212573-s001.pdf]

## Supplemental Online Content

Nikolova VL, Smith MRB, Hall LJ, Cleare AJ, Stone JM, Young AH. Perturbations in gut microbiota composition in psychiatric disorders: a systematic review and meta-analysis. *JAMA Psychiatry*. Published online September 15, 2021.  
doi:10.1001/jamapsychiatry.2021.2573

**eAppendix 1.** Systematic search details

**eAppendix 2.** Quality assessment

**eAppendix 3.** Detailed methods of the meta-analysis performed

**eAppendix 4.** PRISMA flowcharts for the umbrella review search and the updated review searches

**eAppendix 5.** Details of the identified systematic reviews

**eAppendix 6.** Detailed characteristics of the included studies

**eAppendix 7.** Stool sample processing methods in the included studies

**eAppendix 8.** Publication bias assessment for the alpha diversity meta-analyses

**eAppendix 9.** Beta diversity

**eAppendix 10.** Figures for study-level findings of relative abundance of microbial taxa

This supplemental material has been provided by the authors to give readers additional information about their work.

## eAppendix 1. Systematic search details

### 1. Systematic reviews and meta-analysis search – performed on 27 Jan 2021

#### 1.1. Cochrane Library

| Search                                                                                    | Hits |
|-------------------------------------------------------------------------------------------|------|
| Cochrane Reviews                                                                          | 8498 |
| Topic Mental Health                                                                       | 637  |
| AND gut OR gastrointestinal OR intestinal OR fecal OR fecal OR stool                      | 56   |
| AND microbiome OR microbiota OR ecosystem OR bacteria OR flora OR microflora OR dysbiosis | 0    |

#### 1.2. PubMed\*

| Search                                                                                                                                                                                                                                                                                                                                                                                                                                                                                                                                                                                                | Hits |
|-------------------------------------------------------------------------------------------------------------------------------------------------------------------------------------------------------------------------------------------------------------------------------------------------------------------------------------------------------------------------------------------------------------------------------------------------------------------------------------------------------------------------------------------------------------------------------------------------------|------|
| ((gut) OR (gastrointestinal) OR (intestinal) OR (fecal) OR (fecal) OR (stool))<br>AND ((microbiome) OR (microbiota) OR (ecosystem) OR (bacteria) OR (flora) OR (microflora) OR (dysbiosis))<br>AND ((depression) OR (depress*) OR (mdd) OR (trd) OR (bipolar) OR (mania) OR (bipolar depression) OR (anxiety) OR (psychosis) OR (schizophrenia) OR (obsessive compulsive disorder) OR (ocd) OR (ptsd) OR (post-traumatic stress disorder) OR (adhd) OR (attention deficit hyperactivity disorder) OR (autism) OR (autism spectrum disorder) OR (ASD) OR (eating disorder) OR (anorexia) OR (bulimia)) | 3699 |
| AND (systematicreview[Filter])                                                                                                                                                                                                                                                                                                                                                                                                                                                                                                                                                                        | 80   |
| Limits: 2005-current                                                                                                                                                                                                                                                                                                                                                                                                                                                                                                                                                                                  | 79   |
| Limits: human                                                                                                                                                                                                                                                                                                                                                                                                                                                                                                                                                                                         | 47   |
| Limits: English                                                                                                                                                                                                                                                                                                                                                                                                                                                                                                                                                                                       | 45   |

#### 1.3. Embase & PsychINFO (via Ovid)

| Search                                                                                  | Hits   |
|-----------------------------------------------------------------------------------------|--------|
| 1. gut.mp. [mp=ti, ab, hw, tn, ot, dm, mf, dv, kw, fx, dq, tc, id, tm, mh]              | 138475 |
| 2. gastrointestinal.mp. [mp=ti, ab, hw, tn, ot, dm, mf, dv, kw, fx, dq, tc, id, tm, mh] | 612345 |
| 3. intestinal.mp. [mp=ti, ab, hw, tn, ot, dm, mf, dv, kw, fx, dq, tc, id, tm, mh]       | 370239 |
| 4. fecal.mp. [mp=ti, ab, hw, tn, ot, dm, mf, dv, kw, fx, dq, tc, id, tm, mh]            | 167    |
| 5. fecal.mp. [mp=ti, ab, hw, tn, ot, dm, mf, dv, kw, fx, dq, tc, id, tm, mh]            | 87064  |
| 6. stool.mp. [mp=ti, ab, hw, tn, ot, dm, mf, dv, kw, fx, dq, tc, id, tm, mh]            | 60712  |
| 7. microbiome.mp. [mp=ti, ab, hw, tn, ot, dm, mf, dv, kw, fx, dq, tc, id, tm, mh]       | 42743  |
| 8. microbiota.mp. [mp=ti, ab, hw, tn, ot, dm, mf, dv, kw, fx, dq, tc, id, tm, mh]       | 68233  |
| 9. ecosystem.mp. [mp=ti, ab, hw, tn, ot, dm, mf, dv, kw, fx, dq, tc, id, tm, mh]        | 111701 |
| 10. bacteria.mp. [mp=ti, ab, hw, tn, ot, dm, mf, dv, kw, fx, dq, tc, id, tm, mh]        | 464415 |
| 11. flora.mp. [mp=ti, ab, hw, tn, ot, dm, mf, dv, kw, fx, dq, tc, id, tm, mh]           | 108206 |
| 12. microflora.mp. [mp=ti, ab, hw, tn, ot, dm, mf, dv, kw, fx, dq, tc, id, tm, mh]      | 56856  |
| 13. dysbiosis.mp. [mp=ti, ab, hw, tn, ot, dm, mf, dv, kw, fx, dq, tc, id, tm, mh]       | 14943  |

|                                                                                                                                      |            |
|--------------------------------------------------------------------------------------------------------------------------------------|------------|
| 14. depression.mp. [mp=ti, ab, hw, tn, ot, dm, mf, dv, kw, fx, dq, tc, id, tm, mh]                                                   | 1041348    |
| 15. depress*.mp. [mp=ti, ab, hw, tn, ot, dm, mf, dv, kw, fx, dq, tc, id, tm, mh]                                                     | 1193818    |
| 16. MDD.mp. [mp=ti, ab, hw, tn, ot, dm, mf, dv, kw, fx, dq, tc, id, tm, mh]                                                          | 32383      |
| 17. TRD.mp. [mp=ti, ab, hw, tn, ot, dm, mf, dv, kw, fx, dq, tc, id, tm, mh]                                                          | 3628       |
| 18. bipolar.mp. [mp=ti, ab, hw, tn, ot, dm, mf, dv, kw, fx, dq, tc, id, tm, mh]                                                      | 159279     |
| 19. mania.mp. [mp=ti, ab, hw, tn, ot, dm, mf, dv, kw, fx, dq, tc, id, tm, mh]                                                        | 42988      |
| 20. bipolar depression.mp. [mp=ti, ab, hw, tn, ot, dm, mf, dv, kw, fx, dq, tc, id, tm, mh]                                           | 10336      |
| 21. anxiety.mp. [mp=ti, ab, hw, tn, ot, dm, mf, dv, kw, fx, dq, tc, id, tm, mh]                                                      | 626469     |
| 22. psychosis.mp. [mp=ti, ab, hw, tn, ot, dm, mf, dv, kw, fx, dq, tc, id, tm, mh]                                                    | 186882     |
| 23. schizophrenia.mp. [mp=ti, ab, hw, tn, ot, dm, mf, dv, kw, fx, dq, tc, id, tm, mh]                                                | 341812     |
| 24. obsessive compulsive disorder.mp. [mp=ti, ab, hw, tn, ot, dm, mf, dv, kw, fx, dq, tc, id, tm, mh]                                | 50116      |
| 25. OCD.mp. [mp=ti, ab, hw, tn, ot, dm, mf, dv, kw, fx, dq, tc, id, tm, mh]                                                          | 26104      |
| 26. PTSD.mp. [mp=ti, ab, hw, tn, ot, dm, mf, dv, kw, fx, dq, tc, id, tm, mh]                                                         | 72988      |
| 27. post-traumatic stress disorder.mp. [mp=ti, ab, hw, tn, ot, dm, mf, dv, kw, fx, dq, tc, id, tm, mh]                               | 28176      |
| 28. autism.mp. [mp=ti, ab, hw, tn, ot, dm, mf, dv, kw, fx, dq, tc, id, tm, mh]                                                       | 134153     |
| 29. Autism spectrum disorder.mp. [mp=ti, ab, hw, tn, ot, dm, mf, dv, kw, fx, dq, tc, id, tm, mh]                                     | 42153      |
| 30. pervasive developmental disorder.mp. [mp=ti, ab, hw, tn, ot, dm, mf, dv, kw, fx, dq, tc, id, tm, mh]                             | 4354       |
| 31. attention deficit hyperactivity disorder.mp. [mp=ti, ab, hw, tn, ot, dm, mf, dv, kw, fx, dq, tc, id, tm, mh]                     | 61349      |
| 32. ADHD.mp. [mp=ti, ab, hw, tn, ot, dm, mf, dv, kw, fx, dq, tc, id, tm, mh]                                                         | 69132      |
| 33. eating disorder.mp. [mp=ti, ab, hw, tn, ot, dm, mf, dv, kw, fx, dq, tc, id, tm, mh]                                              | 49763      |
| 34. anorexia.mp. [mp=ti, ab, hw, tn, ot, dm, mf, dv, kw, fx, dq, tc, id, tm, mh]                                                     | 108326     |
| 35. bulimia.mp. [mp=ti, ab, hw, tn, ot, dm, mf, dv, kw, fx, dq, tc, id, tm, mh]                                                      | 28823      |
| 36. systematic review.mp. [mp=ti, ab, hw, tn, ot, dm, mf, dv, kw, fx, dq, tc, id, tm, mh]                                            | 386059     |
| 37. meta-analysis.mp. [mp=ti, ab, hw, tn, ot, dm, mf, dv, kw, fx, dq, tc, id, tm, mh]                                                | 338776     |
| 38. 1 or 2 or 3 or 4 or 5 or 6                                                                                                       | 1066368    |
| 39. 7 or 8 or 9 or 10 or 11 or 12 or 13                                                                                              | 693756     |
| 40. 14 or 15 or 16 or 17 or 18 or 19 or 20 or 21 or 22 or 23 or 24 or 25 or 26 or 27 or 28 or 29 or 30 or 31 or 32 or 33 or 34 or 35 | 2248227    |
| 41. 36 or 37                                                                                                                         | 557086     |
| 42. 38 AND 39 AND 40 AND 41                                                                                                          | 252        |
| 43. limit 42 to english language                                                                                                     | 241        |
| 44. limit 43 to human                                                                                                                | 236        |
| 45. limit 44 to yr="2005 -Current"                                                                                                   | <b>234</b> |

## 2. Supplementary searches – all performed on 02 Feb 2021

### 2.1. PTSD & OCD – no date restriction as no systematic reviews were available

#### 2.1.1. PubMed

| Search                                                                                                                                                                                                                                                                                      | Hits |
|---------------------------------------------------------------------------------------------------------------------------------------------------------------------------------------------------------------------------------------------------------------------------------------------|------|
| ((gut) OR (gastrointestinal) OR (intestinal) OR (fecal) OR (fecal) OR (stool))<br>AND ((microbiome) OR (microbiota) OR (ecosystem) OR (bacteria) OR (flora) OR (microflora) OR (dysbiosis))<br>AND ((obsessive compulsive disorder) OR (ocd) OR (ptsd) OR (post-traumatic stress disorder)) | 45   |
| Limits: human, English                                                                                                                                                                                                                                                                      | 20   |

#### 2.1.2. Embase & PsychINFO (via Ovid)

| Search                                                                                                 | Hits    |
|--------------------------------------------------------------------------------------------------------|---------|
| 1. gut.mp. [mp=ti, ab, hw, tn, ot, dm, mf, dv, kw, fx, dq, tc, id, tm, mh]                             | 138693  |
| 2. gastrointestinal.mp. [mp=ti, ab, hw, tn, ot, dm, mf, dv, kw, fx, dq, tc, id, tm, mh]                | 612886  |
| 3. intestinal.mp. [mp=ti, ab, hw, tn, ot, dm, mf, dv, kw, fx, dq, tc, id, tm, mh]                      | 370633  |
| 4. fecal.mp. [mp=ti, ab, hw, tn, ot, dm, mf, dv, kw, fx, dq, tc, id, tm, mh]                           | 167     |
| 5. fecal.mp. [mp=ti, ab, hw, tn, ot, dm, mf, dv, kw, fx, dq, tc, id, tm, mh]                           | 87197   |
| 6. stool.mp. [mp=ti, ab, hw, tn, ot, dm, mf, dv, kw, fx, dq, tc, id, tm, mh]                           | 60767   |
| 7. microbiome.mp. [mp=ti, ab, hw, tn, ot, dm, mf, dv, kw, fx, dq, tc, id, tm, mh]                      | 42848   |
| 8. microbiota.mp. [mp=ti, ab, hw, tn, ot, dm, mf, dv, kw, fx, dq, tc, id, tm, mh]                      | 68365   |
| 9. ecosystem.mp. [mp=ti, ab, hw, tn, ot, dm, mf, dv, kw, fx, dq, tc, id, tm, mh]                       | 111818  |
| 10. bacteria.mp. [mp=ti, ab, hw, tn, ot, dm, mf, dv, kw, fx, dq, tc, id, tm, mh]                       | 464960  |
| 11. flora.mp. [mp=ti, ab, hw, tn, ot, dm, mf, dv, kw, fx, dq, tc, id, tm, mh]                          | 108206  |
| 12. microflora.mp. [mp=ti, ab, hw, tn, ot, dm, mf, dv, kw, fx, dq, tc, id, tm, mh]                     | 56939   |
| 13. dysbiosis.mp. [mp=ti, ab, hw, tn, ot, dm, mf, dv, kw, fx, dq, tc, id, tm, mh]                      | 14988   |
| 14. obsessive compulsive disorder.mp. [mp=ti, ab, hw, tn, ot, dm, mf, dv, kw, fx, dq, tc, id, tm, mh]  | 50157   |
| 15. OCD.mp. [mp=ti, ab, hw, tn, ot, dm, mf, dv, kw, fx, dq, tc, id, tm, mh]                            | 26128   |
| 16. PTSD.mp. [mp=ti, ab, hw, tn, ot, dm, mf, dv, kw, fx, dq, tc, id, tm, mh]                           | 73062   |
| 17. post-traumatic stress disorder.mp. [mp=ti, ab, hw, tn, ot, dm, mf, dv, kw, fx, dq, tc, id, tm, mh] | 28199   |
| 18. 1 or 2 or 3 or 4 or 5 or 6                                                                         | 1067443 |
| 19. 7 or 8 or 9 or 10 or 11 or 12 or 13                                                                | 694634  |
| 20. 14 or 15 or 16 or 17                                                                               | 133639  |
| 21. 18 AND 19 AND 20                                                                                   | 98      |
| 22. limit 42 to english language                                                                       | 95      |
| 23. limit 43 to human                                                                                  | 66      |

### 2.2. Anxiety & Depression - last review search of both disorders done in March 2020 (Simpson et al., 2021)

#### 2.2.1. Pubmed

| Search                                                                                                                                                                                                                                                                                | Hits |
|---------------------------------------------------------------------------------------------------------------------------------------------------------------------------------------------------------------------------------------------------------------------------------------|------|
| ((gut) OR (gastrointestinal) OR (intestinal) OR (fecal) OR (fecal) OR (stool))<br>AND ((microbiome) OR (microbiota) OR (ecosystem) OR (bacteria) OR (flora) OR (microflora)<br>OR (dysbiosis))<br>AND ((depression) OR (depress*) OR (mdd) OR (trd) OR (anxiety))<br>AND NOT (review) | 1714 |
| Limits: human, English, start date: February 2020                                                                                                                                                                                                                                     | 42   |

### 2.2.2. Embase & PsychINFO (via Ovid)

| Search                                                                                  | Hits    |
|-----------------------------------------------------------------------------------------|---------|
| 1. gut.mp. [mp=ti, ab, hw, tn, ot, dm, mf, dv, kw, fx, dq, tc, id, tm, mh]              | 138693  |
| 2. gastrointestinal.mp. [mp=ti, ab, hw, tn, ot, dm, mf, dv, kw, fx, dq, tc, id, tm, mh] | 612886  |
| 3. intestinal.mp. [mp=ti, ab, hw, tn, ot, dm, mf, dv, kw, fx, dq, tc, id, tm, mh]       | 370633  |
| 4. fecal.mp. [mp=ti, ab, hw, tn, ot, dm, mf, dv, kw, fx, dq, tc, id, tm, mh]            | 167     |
| 5. fecal.mp. [mp=ti, ab, hw, tn, ot, dm, mf, dv, kw, fx, dq, tc, id, tm, mh]            | 87197   |
| 6. stool.mp. [mp=ti, ab, hw, tn, ot, dm, mf, dv, kw, fx, dq, tc, id, tm, mh]            | 60767   |
| 7. microbiome.mp. [mp=ti, ab, hw, tn, ot, dm, mf, dv, kw, fx, dq, tc, id, tm, mh]       | 42848   |
| 8. microbiota.mp. [mp=ti, ab, hw, tn, ot, dm, mf, dv, kw, fx, dq, tc, id, tm, mh]       | 68365   |
| 9. ecosystem.mp. [mp=ti, ab, hw, tn, ot, dm, mf, dv, kw, fx, dq, tc, id, tm, mh]        | 111818  |
| 10. bacteria.mp. [mp=ti, ab, hw, tn, ot, dm, mf, dv, kw, fx, dq, tc, id, tm, mh]        | 464960  |
| 11. flora.mp. [mp=ti, ab, hw, tn, ot, dm, mf, dv, kw, fx, dq, tc, id, tm, mh]           | 108206  |
| 12. microflora.mp. [mp=ti, ab, hw, tn, ot, dm, mf, dv, kw, fx, dq, tc, id, tm, mh]      | 56939   |
| 13. dysbiosis.mp. [mp=ti, ab, hw, tn, ot, dm, mf, dv, kw, fx, dq, tc, id, tm, mh]       | 14988   |
| 14. depression.mp. [mp=ti, ab, hw, tn, ot, dm, mf, dv, kw, fx, dq, tc, id, tm, mh]      | 1047721 |
| 15. depress*.mp. [mp=ti, ab, hw, tn, ot, dm, mf, dv, kw, fx, dq, tc, id, tm, mh]        | 1200820 |
| 16. MDD.mp. [mp=ti, ab, hw, tn, ot, dm, mf, dv, kw, fx, dq, tc, id, tm, mh]             | 32605   |
| 17. TRD.mp. [mp=ti, ab, hw, tn, ot, dm, mf, dv, kw, fx, dq, tc, id, tm, mh]             | 3663    |
| 18. anxiety.mp. [mp=ti, ab, hw, tn, ot, dm, mf, dv, kw, fx, dq, tc, id, tm, mh]         | 630521  |
| 19. 1 or 2 or 3 or 4 or 5 or 6                                                          | 1067443 |
| 20. 7 or 8 or 9 or 10 or 11 or 12 or 13                                                 | 694634  |
| 21. 14 or 15 or 16 or 17 or 18                                                          | 1511690 |
| 22. 19 AND 20 AND 21                                                                    | 2774    |
| 23. limit 22 to english language                                                        | 2687    |
| 24. limit 23 to human                                                                   | 1894    |
| 25. limit 24 to yr="2020 -Current"                                                      | 509     |
| 26. review.mp. [mp=ti, ab, hw, tn, ot, dm, mf, dv, kw, fx, dq, tc, id, tm, mh]          | 4370959 |
| 27. 25 NOT 26                                                                           | 278     |

**2.3. Bipolar Disorder & Psychosis/Schizophrenia - last review search of both disorders done on 17 Jan 2019 (Vindegaard et al., 2020)**

**2.3.1. PubMed**

| Search                                                                                                                                                                                                                                                                                                  | Hits |
|---------------------------------------------------------------------------------------------------------------------------------------------------------------------------------------------------------------------------------------------------------------------------------------------------------|------|
| ((gut) OR (gastrointestinal) OR (intestinal) OR (fecal) OR (fecal) OR (stool))<br>AND ((microbiome) OR (microbiota) OR (ecosystem) OR (bacteria) OR (flora) OR (microflora) OR (dysbiosis))<br>AND ((bipolar) OR (mania) OR (bipolar depression) OR (psychosis) OR (schizophrenia))<br>AND NOT (review) | 199  |
| Limits: human, English, start date: January 2019                                                                                                                                                                                                                                                        | 84   |

**2.3.2. Embase & PsychINFO (via Ovid)**

| Search                                                                                     | Hits    |
|--------------------------------------------------------------------------------------------|---------|
| 1. gut.mp. [mp=ti, ab, hw, tn, ot, dm, mf, dv, kw, fx, dq, tc, id, tm, mh]                 | 138693  |
| 2. gastrointestinal.mp. [mp=ti, ab, hw, tn, ot, dm, mf, dv, kw, fx, dq, tc, id, tm, mh]    | 612886  |
| 3. intestinal.mp. [mp=ti, ab, hw, tn, ot, dm, mf, dv, kw, fx, dq, tc, id, tm, mh]          | 370633  |
| 4. fecal.mp. [mp=ti, ab, hw, tn, ot, dm, mf, dv, kw, fx, dq, tc, id, tm, mh]               | 167     |
| 5. fecal.mp. [mp=ti, ab, hw, tn, ot, dm, mf, dv, kw, fx, dq, tc, id, tm, mh]               | 87197   |
| 6. stool.mp. [mp=ti, ab, hw, tn, ot, dm, mf, dv, kw, fx, dq, tc, id, tm, mh]               | 60767   |
| 7. microbiome.mp. [mp=ti, ab, hw, tn, ot, dm, mf, dv, kw, fx, dq, tc, id, tm, mh]          | 42848   |
| 8. microbiota.mp. [mp=ti, ab, hw, tn, ot, dm, mf, dv, kw, fx, dq, tc, id, tm, mh]          | 68365   |
| 9. ecosystem.mp. [mp=ti, ab, hw, tn, ot, dm, mf, dv, kw, fx, dq, tc, id, tm, mh]           | 111818  |
| 10. bacteria.mp. [mp=ti, ab, hw, tn, ot, dm, mf, dv, kw, fx, dq, tc, id, tm, mh]           | 464960  |
| 11. flora.mp. [mp=ti, ab, hw, tn, ot, dm, mf, dv, kw, fx, dq, tc, id, tm, mh]              | 108206  |
| 12. microflora.mp. [mp=ti, ab, hw, tn, ot, dm, mf, dv, kw, fx, dq, tc, id, tm, mh]         | 56939   |
| 13. dysbiosis.mp. [mp=ti, ab, hw, tn, ot, dm, mf, dv, kw, fx, dq, tc, id, tm, mh]          | 14988   |
| 14. bipolar.mp. [mp=ti, ab, hw, tn, ot, dm, mf, dv, kw, fx, dq, tc, id, tm, mh]            | 160089  |
| 15. mania.mp. [mp=ti, ab, hw, tn, ot, dm, mf, dv, kw, fx, dq, tc, id, tm, mh]              | 43186   |
| 16. bipolar depression.mp. [mp=ti, ab, hw, tn, ot, dm, mf, dv, kw, fx, dq, tc, id, tm, mh] | 10387   |
| 17. psychosis.mp. [mp=ti, ab, hw, tn, ot, dm, mf, dv, kw, fx, dq, tc, id, tm, mh]          | 187899  |
| 18. schizophrenia.mp. [mp=ti, ab, hw, tn, ot, dm, mf, dv, kw, fx, dq, tc, id, tm, mh]      | 343421  |
| 19. 1 or 2 or 3 or 4 or 5 or 6                                                             | 1067443 |
| 20. 7 or 8 or 9 or 10 or 11 or 12 or 13                                                    | 694634  |
| 21. 14 or 15 or 16 or 17 or 18                                                             | 577348  |
| 22. 19 AND 20 AND 21                                                                       | 661     |
| 23. limit 22 to 6English language                                                          | 631     |
| 24. limit 23 to human                                                                      | 551     |
| 25. limit 24 to yr="2019 -Current"                                                         | 291     |
| 26. review.mp. [mp=ti, ab, hw, tn, ot, dm, mf, dv, kw, fx, dq, tc, id, tm, mh]             | 4370959 |

|               |     |
|---------------|-----|
| 27. 25 NOT 26 | 148 |
|---------------|-----|

#### 2.4. ADHD & ASD: last review search of both disorders done on 31Aug2018 (Jurek et al., 2020).

##### 2.4.1. PubMed

| Search                                                                                                                                                                                                                                                                                                                           | Hits |
|----------------------------------------------------------------------------------------------------------------------------------------------------------------------------------------------------------------------------------------------------------------------------------------------------------------------------------|------|
| ((gut) OR (gastrointestinal) OR (intestinal) OR (fecal) OR (fecal) OR (stool))<br>AND ((microbiome) OR (microbiota) OR (ecosystem) OR (bacteria) OR (flora) OR (microflora) OR (dysbiosis))<br>AND ((adhd) OR (attention deficit hyperactivity disorder) OR (autism) OR (autism spectrum disorder) OR (ASD))<br>AND NOT (review) | 415  |
| Limits: human, English, start date: August 2018                                                                                                                                                                                                                                                                                  | 20   |

##### 2.4.2. Embase & PsychINFO (via Ovid)

| Search                                                                                                           | Hits    |
|------------------------------------------------------------------------------------------------------------------|---------|
| 1. gut.mp. [mp=ti, ab, hw, tn, ot, dm, mf, dv, kw, fx, dq, tc, id, tm, mh]                                       | 138693  |
| 2. gastrointestinal.mp. [mp=ti, ab, hw, tn, ot, dm, mf, dv, kw, fx, dq, tc, id, tm, mh]                          | 612886  |
| 3. intestinal.mp. [mp=ti, ab, hw, tn, ot, dm, mf, dv, kw, fx, dq, tc, id, tm, mh]                                | 370633  |
| 4. fecal.mp. [mp=ti, ab, hw, tn, ot, dm, mf, dv, kw, fx, dq, tc, id, tm, mh]                                     | 167     |
| 5. fecal.mp. [mp=ti, ab, hw, tn, ot, dm, mf, dv, kw, fx, dq, tc, id, tm, mh]                                     | 87197   |
| 6. stool.mp. [mp=ti, ab, hw, tn, ot, dm, mf, dv, kw, fx, dq, tc, id, tm, mh]                                     | 60767   |
| 7. microbiome.mp. [mp=ti, ab, hw, tn, ot, dm, mf, dv, kw, fx, dq, tc, id, tm, mh]                                | 42848   |
| 8. microbiota.mp. [mp=ti, ab, hw, tn, ot, dm, mf, dv, kw, fx, dq, tc, id, tm, mh]                                | 68365   |
| 9. ecosystem.mp. [mp=ti, ab, hw, tn, ot, dm, mf, dv, kw, fx, dq, tc, id, tm, mh]                                 | 111818  |
| 10. bacteria.mp. [mp=ti, ab, hw, tn, ot, dm, mf, dv, kw, fx, dq, tc, id, tm, mh]                                 | 464960  |
| 11. flora.mp. [mp=ti, ab, hw, tn, ot, dm, mf, dv, kw, fx, dq, tc, id, tm, mh]                                    | 108206  |
| 12. microflora.mp. [mp=ti, ab, hw, tn, ot, dm, mf, dv, kw, fx, dq, tc, id, tm, mh]                               | 56939   |
| 13. dysbiosis.mp. [mp=ti, ab, hw, tn, ot, dm, mf, dv, kw, fx, dq, tc, id, tm, mh]                                | 14988   |
| 14. attention deficit hyperactivity disorder.mp. [mp=ti, ab, hw, tn, ot, dm, mf, dv, kw, fx, dq, tc, id, tm, mh] | 61699   |
| 15. adhd.mp. [mp=ti, ab, hw, tn, ot, dm, mf, dv, kw, fx, dq, tc, id, tm, mh]                                     | 69524   |
| 16. autism.mp. [mp=ti, ab, hw, tn, ot, dm, mf, dv, kw, fx, dq, tc, id, tm, mh]                                   | 135286  |
| 17. autism spectrum disorder.mp. [mp=ti, ab, hw, tn, ot, dm, mf, dv, kw, fx, dq, tc, id, tm, mh]                 | 42650   |
| 18. ASD.mp. [mp=ti, ab, hw, tn, ot, dm, mf, dv, kw, fx, dq, tc, id, tm, mh]                                      | 56686   |
| 19. 1 or 2 or 3 or 4 or 5 or 6                                                                                   | 1067443 |
| 20. 7 or 8 or 9 or 10 or 11 or 12 or 13                                                                          | 694634  |
| 21. 14 or 15 or 16 or 17 or 18                                                                                   | 221434  |
| 22. 19 AND 20 AND 21                                                                                             | 1209    |
| 23. limit 22 to english language                                                                                 | 1159    |

|                                                                                |         |
|--------------------------------------------------------------------------------|---------|
| 24. limit 23 to human                                                          | 962     |
| 25. limit 24 to yr="2018 -Current"                                             | 531     |
| 26. adult.mp. [mp=ti, ab, hw, tn, ot, dm, mf, dv, kw, fx, dq, tc, id, tm, mh]  | 8881500 |
| 27. 25 AND 26                                                                  | 63      |
| 28. review.mp. [mp=ti, ab, hw, tn, ot, dm, mf, dv, kw, fx, dq, tc, id, tm, mh] | 4370959 |
| 29. 27 NOT 28                                                                  | 46      |

## 2.5. Eating disorders: last review search done in June 2020 (Di Ludovico et al., 2021).

### 2.5.1. PubMed

| Search                                                                                                                                                                                                                                                                | Hits |
|-----------------------------------------------------------------------------------------------------------------------------------------------------------------------------------------------------------------------------------------------------------------------|------|
| ((gut) OR (gastrointestinal) OR (intestinal) OR (fecal) OR (fecal) OR (stool))<br>AND ((microbiome) OR (microbiota) OR (ecosystem) OR (bacteria) OR (flora) OR (microflora) OR (dysbiosis))<br>AND ((eating disorder) OR (anorexia) OR (bulimia))<br>AND NOT (review) | 489  |
| Limits: human, English, start date: May 2020                                                                                                                                                                                                                          | 13   |

### 2.5.2. Embase & PsychINFO (via Ovid)

| Search                                                                                   | Hits    |
|------------------------------------------------------------------------------------------|---------|
| 30. gut.mp. [mp=ti, ab, hw, tn, ot, dm, mf, dv, kw, fx, dq, tc, id, tm, mh]              | 138693  |
| 31. gastrointestinal.mp. [mp=ti, ab, hw, tn, ot, dm, mf, dv, kw, fx, dq, tc, id, tm, mh] | 612886  |
| 32. intestinal.mp. [mp=ti, ab, hw, tn, ot, dm, mf, dv, kw, fx, dq, tc, id, tm, mh]       | 370633  |
| 33. fecal.mp. [mp=ti, ab, hw, tn, ot, dm, mf, dv, kw, fx, dq, tc, id, tm, mh]            | 167     |
| 34. fecal.mp. [mp=ti, ab, hw, tn, ot, dm, mf, dv, kw, fx, dq, tc, id, tm, mh]            | 87197   |
| 35. stool.mp. [mp=ti, ab, hw, tn, ot, dm, mf, dv, kw, fx, dq, tc, id, tm, mh]            | 60767   |
| 36. microbiome.mp. [mp=ti, ab, hw, tn, ot, dm, mf, dv, kw, fx, dq, tc, id, tm, mh]       | 42848   |
| 37. microbiota.mp. [mp=ti, ab, hw, tn, ot, dm, mf, dv, kw, fx, dq, tc, id, tm, mh]       | 68365   |
| 38. ecosystem.mp. [mp=ti, ab, hw, tn, ot, dm, mf, dv, kw, fx, dq, tc, id, tm, mh]        | 111818  |
| 39. bacteria.mp. [mp=ti, ab, hw, tn, ot, dm, mf, dv, kw, fx, dq, tc, id, tm, mh]         | 464960  |
| 40. flora.mp. [mp=ti, ab, hw, tn, ot, dm, mf, dv, kw, fx, dq, tc, id, tm, mh]            | 108206  |
| 41. microflora.mp. [mp=ti, ab, hw, tn, ot, dm, mf, dv, kw, fx, dq, tc, id, tm, mh]       | 56939   |
| 42. dysbiosis.mp. [mp=ti, ab, hw, tn, ot, dm, mf, dv, kw, fx, dq, tc, id, tm, mh]        | 14988   |
| 43. eating disorder.mp. [mp=ti, ab, hw, tn, ot, dm, mf, dv, kw, fx, dq, tc, id, tm, mh]  | 50029   |
| 44. anorexia.mp. [mp=ti, ab, hw, tn, ot, dm, mf, dv, kw, fx, dq, tc, id, tm, mh]         | 108993  |
| 45. bulimia.mp. [mp=ti, ab, hw, tn, ot, dm, mf, dv, kw, fx, dq, tc, id, tm, mh]          | 28918   |
| 46. 1 or 2 or 3 or 4 or 5 or 6                                                           | 1067443 |
| 47. 7 or 8 or 9 or 10 or 11 or 12 or 13                                                  | 694634  |
| 48. 14 or 15 or 16                                                                       | 152111  |



|                                                                                |         |
|--------------------------------------------------------------------------------|---------|
| 49. 17 AND 18 AND 19                                                           | 550     |
| 50. limit 20 to english language                                               | 512     |
| 51. limit 21 to human                                                          | 392     |
| 52. limit 22 to yr="2020 -Current"                                             | 83      |
| 53. review.mp. [mp=ti, ab, hw, tn, ot, dm, mf, dv, kw, fx, dq, tc, id, tm, mh] | 4370959 |
| 54. 23 NOT 24                                                                  | 37      |

## eAppendix 2. Quality assessment

Two authors (VLN and MRBS) performed the rating independently and resolved discrepancies via discussion.

**Summary:** The overall risk of bias in the systematic reviews was low (12/16) (Table S5.1), however, only 3/16 had a pre-registered protocol (Table S3.1). The most frequent concerns were the lack of clarity how evidence was collected and evaluated for quality and the thoroughness of the search strategy (Figure S5.1). However, due to the significant overlap, a recent high-quality review was available for each disorder. Regarding original studies published after the reviews, quality was high as assessed with the JBI tool for case-control studies. The primary concern was incomplete consideration of confounders with 7/20 either not identifying these and/or not accounting for them in the analyses. We did not penalize studies that considered only some factors (e.g. age, gender, psychiatric medication) as other, particularly lifestyle factors such as diet, are difficult to fully control.

**Table e2.1.** Quality assessment of the included systematic reviews using the ROBIS tool.

| Review       |              |      | Phase 1                       |                                            |                                        |                           | Phase 2                     |
|--------------|--------------|------|-------------------------------|--------------------------------------------|----------------------------------------|---------------------------|-----------------------------|
| Disorder     | First Author | Year | 1. Study eligibility criteria | 2. Identification and selection of studies | 3. Data collection and study appraisal | 4. Synthesis and findings | RISK OF BIAS IN THE REVIEW* |
| AN           | Di Lodovico  | 2021 | low                           | low                                        | low                                    | low                       | low                         |
| AN           | Schalla      | 2019 | low                           | high                                       | unclear                                | high                      | low                         |
| AN           | Schwensen    | 2018 | unclear                       | high                                       | low                                    | low                       | low                         |
| MDD, ANX     | Simpson      | 2021 | low                           | low                                        | low                                    | low                       | low                         |
| MDD, SCZ     | Fond         | 2020 | high                          | high                                       | unclear                                | unclear                   | high                        |
| MDD          | Li           | 2020 | unclear                       | high                                       | unclear                                | high                      | high                        |
| MDD, ANX     | Simpson      | 2020 | low                           | low                                        | low                                    | low                       | low                         |
| MDD          | Sanada       | 2020 | low                           | low                                        | low                                    | low                       | low                         |
| MDD, BD, SCZ | Vindeggaard  | 2020 | low                           | low                                        | low                                    | low                       | low                         |
| MDD          | Cheung       | 2019 | low                           | high                                       | high                                   | unclear                   | unclear                     |
| MDD          | Barandouzi   | 2020 | low                           | low                                        | low                                    | high                      | low                         |
| BD, SCZ      | Nguyen       | 2019 | low                           | low                                        | unclear                                | low                       | low                         |
| BD, SCZ      | Nguyen       | 2018 | high                          | unclear                                    | unclear                                | low                       | low                         |
| SCZ          | Cuomo        | 2018 | high                          | high                                       | high                                   | high                      | high                        |
| SCZ          | Kraeuter     | 2020 | low                           | low                                        | low                                    | low                       | low                         |
| ASD, ADHD    | Jurek        | 2020 | low                           | low                                        | low                                    | low                       | low                         |

Low = low risk of bias, high = high risk of bias, unclear = insufficient information to assess risk of bias; \*this criterion is scored by answering the following questions: A. Did the interpretation of findings address all of the concerns identified the Phase 2 assessment?; B. Was the relevance of identified studies to the review's research question appropriately considered?; and C. Did the reviewers avoid emphasizing results on the basis of their statistical significance?.

**Table e2.2.** Quality assessment of the included original studies published after the systematic reviews using the Joanna Briggs Institute Critical Appraisal Checklist for Case Control Studies.

| Study<br>(First Author &<br>Year) | 1. Were the criteria for inclusion in the sample clearly defined? | 2. Were the study subjects and the setting described in detail? | 3. Was the exposure measured in a valid and reliable way? | 4. Were objective, standard criteria used for measurement of the condition? | 5. Were confounding factors identified? | 6. Were strategies to deal with confounding factors stated? | 7. Were the outcomes measured in a valid and reliable way? | 8. Was appropriate statistical analysis used? |
|-----------------------------------|-------------------------------------------------------------------|-----------------------------------------------------------------|-----------------------------------------------------------|-----------------------------------------------------------------------------|-----------------------------------------|-------------------------------------------------------------|------------------------------------------------------------|-----------------------------------------------|
| Chen 2020                         | yes                                                               | yes                                                             | yes                                                       | yes                                                                         | yes                                     | yes                                                         | yes                                                        | yes                                           |
| Chen 2021                         | yes                                                               | yes                                                             | yes                                                       | yes                                                                         | yes                                     | yes                                                         | yes                                                        | yes                                           |
| Yang 2020                         | yes                                                               | yes                                                             | yes                                                       | yes                                                                         | yes                                     | yes                                                         | yes                                                        | yes                                           |
| Liu 2020                          | yes                                                               | yes                                                             | yes                                                       | yes                                                                         | yes                                     | yes                                                         | yes                                                        | yes                                           |
| Stevens 2020                      | no                                                                | no                                                              | yes                                                       | yes                                                                         | no                                      | no                                                          | yes                                                        | yes                                           |
| Jiang 2020                        | yes                                                               | yes                                                             | yes                                                       | yes                                                                         | yes                                     | no                                                          | yes                                                        | yes                                           |
| McIntyre 2019                     | yes                                                               | yes                                                             | yes                                                       | yes                                                                         | no                                      | no                                                          | yes                                                        | yes                                           |
| Hu 2019                           | yes                                                               | yes                                                             | yes                                                       | yes                                                                         | yes                                     | yes                                                         | yes                                                        | yes                                           |
| Lai 2021                          | yes                                                               | yes                                                             | yes                                                       | yes                                                                         | yes                                     | yes                                                         | yes                                                        | yes                                           |
| Lu 2019                           | yes                                                               | yes                                                             | yes                                                       | yes                                                                         | yes                                     | yes                                                         | yes                                                        | unclear                                       |
| Pan 2020                          | yes                                                               | yes                                                             | yes                                                       | yes                                                                         | yes                                     | no                                                          | yes                                                        | yes                                           |
| Zhu 2020                          | yes                                                               | yes                                                             | yes                                                       | yes                                                                         | yes                                     | yes                                                         | yes                                                        | yes                                           |
| Li 2020                           | yes                                                               | yes                                                             | yes                                                       | yes                                                                         | yes                                     | no                                                          | yes                                                        | yes                                           |
| Ma 2020                           | yes                                                               | yes                                                             | yes                                                       | yes                                                                         | yes                                     | no                                                          | yes                                                        | yes                                           |
| Zhang 2020                        | yes                                                               | yes                                                             | yes                                                       | yes                                                                         | yes                                     | no                                                          | yes                                                        | yes                                           |
| Xu 2020                           | yes                                                               | yes                                                             | yes                                                       | yes                                                                         | yes                                     | yes                                                         | yes                                                        | yes                                           |
| Monteleone 2020                   | yes                                                               | yes                                                             | yes                                                       | yes                                                                         | yes                                     | yes                                                         | yes                                                        | yes                                           |
| Hemmings 2017                     | yes                                                               | yes                                                             | yes                                                       | yes                                                                         | yes                                     | yes                                                         | yes                                                        | yes                                           |
| Domenech n/a                      | yes                                                               | yes                                                             | yes                                                       | yes                                                                         | yes                                     | yes                                                         | yes                                                        | yes                                           |
| Turna 2020                        | yes                                                               | yes                                                             | yes                                                       | yes                                                                         | yes                                     | yes                                                         | yes                                                        | yes                                           |

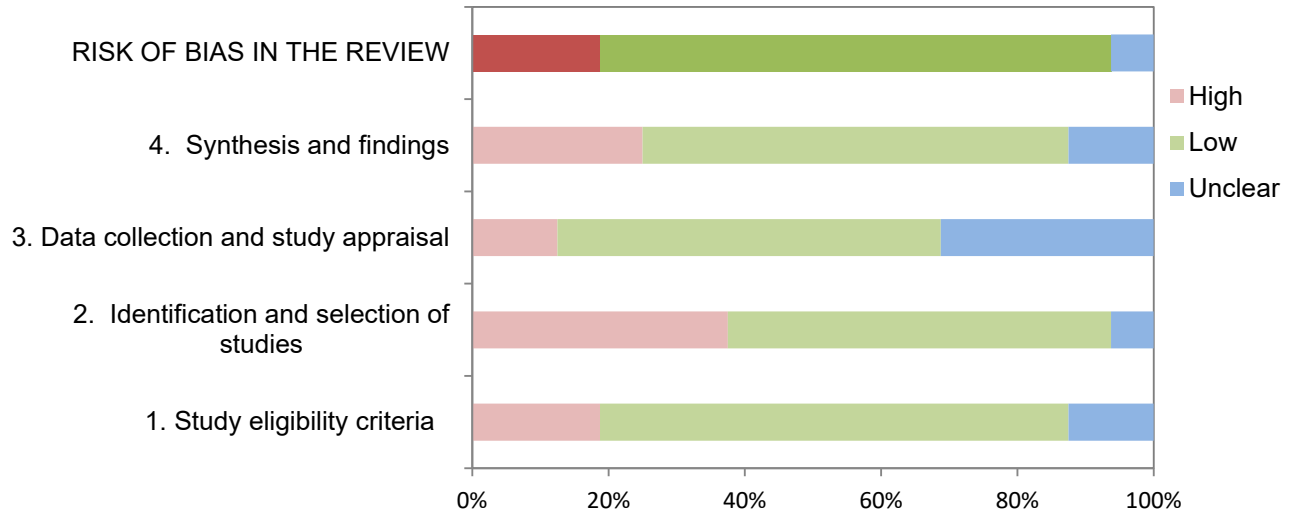

**Figure e5.1.** Quality assessment of the included systematic reviews using the ROBIS tool.

### **eAppendix 3: Detailed methods of the meta-analysis performed**

Medians and inter-quartile ranges were transformed to means (M) and standard deviations (SD) using a web-based tool (<http://www.math.hkbu.edu.hk/~tongt/papers/median2mean.html>). For significantly skewed data, an alternative validated procedure was followed<sup>1</sup>. Where necessary, numerical data were extracted from graphs using WebPlotDigitizer (v.4.4<sup>2</sup>) and Adobe Acrobat's inbuilt measuring tool (Adobe Systems, California, USA), as previously done by others<sup>3</sup>. A random-effects meta-analysis on Hedge's *g* standardised mean difference (SMD) was performed applying the inverse-variance method. Effect size was categorized as small (SMD≤0.2), moderate (SMD=0.5), or large (SMD=0.8). Inter-study heterogeneity was quantified using the DerSimonian–Laird estimator, reported with the I<sup>2</sup> statistic and interpreted according to convention (25% - low, 50% - moderate, and 75% - high)<sup>4</sup>. Publication bias was evaluated with funnel plots and Egger's regression test. Pre-planned subgroup analyses were disorder, region of study (east/west) and use of psychiatric medication. All analyses were completed with the meta package (v.4.17-0<sup>5</sup>) in R.

#### **References:**

1. Wan X, Wang W, Liu J, Tong T. Estimating the sample mean and standard deviation from the sample size, median, range and/or interquartile range. *BMC Med Res Methodol*. 2014;14. doi:10.1186/1471-2288-14-135
2. Rohatgi A. WebPlotDigitizer.; 2020. <https://automeris.io/WebPlotDigitizer>
3. Safadi JM, Quinton AMG, Lennox BR, Burnet PWJ, Minichino A. Gut dysbiosis in severe mental illness and chronic fatigue: a novel trans-diagnostic construct? A systematic review and meta-analysis. *Molecular Psychiatry*. Published online February 8, 2021:1-13. doi:10.1038/s41380-021-01032-1
4. Higgins DJPT. *Cochrane Handbook for Systematic Reviews of Interventions*. John Wiley & Sons; 2008. Accessed December 17, 2020.
5. Balduzzi S, Rücker G, Schwarzer G. How to perform a meta-analysis with R: a practical tutorial. *Evid Based Ment Health*. 2019;22(4):153-160. doi:10.1136/ebmental-2019-300117

**eAppendix 4: PRISMA flowcharts for the umbrella review search and the updated review searches**

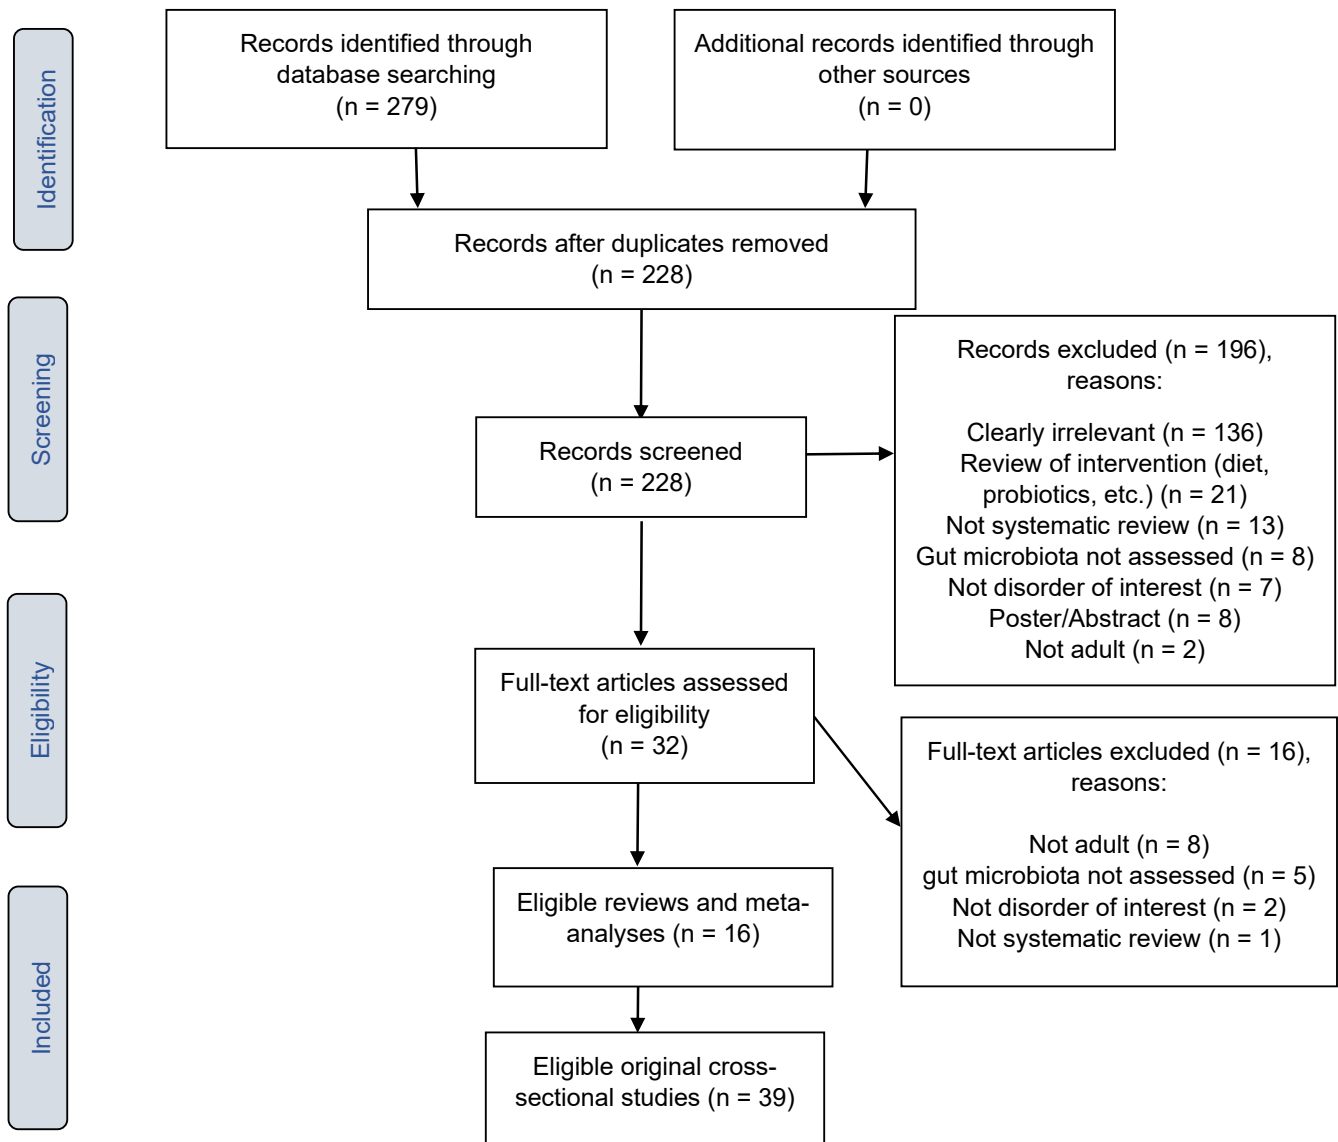

**Figure e4.1. PRISMA flowchart of the umbrella review search**

**Table e4.1. PRISMA charts for the updated systematic review searches.**

|                                             | <b>OCD &amp; PTSD</b>    | <b>MDD &amp; ANX</b>                                                                            | <b>BD &amp; SCZ</b>                                                                                | <b>ASD &amp; ADHD</b>                                             | <b>Eating disorders</b>                                                         |
|---------------------------------------------|--------------------------|-------------------------------------------------------------------------------------------------|----------------------------------------------------------------------------------------------------|-------------------------------------------------------------------|---------------------------------------------------------------------------------|
| <b>Records identified</b>                   | 86                       | 293                                                                                             | 209                                                                                                | 66                                                                | 50                                                                              |
| <b>Reviewed</b>                             | 86                       | 293                                                                                             | 209                                                                                                | 66                                                                | 50                                                                              |
| <b>Excluded at Title/Abstract</b>           | 83                       | 282                                                                                             | 193                                                                                                | 62                                                                | 47                                                                              |
| <b>Excluded at full text (with reasons)</b> | 0                        | 5 (n=1 gut microbiota not assessed; n=2 outcome of interest not reported; n=2 no control group) | 6 (n=2 gut microbiota not assessed, n=1 outcome of interest not assessed; n=3 conference abstract) | 4 (n=2 non-adult, n=1 non-human, n=1 gut microbiota not assessed) | 2 (n=1 secondary analysis from included study, n=1 gut microbiota not analysed) |
| <b>Included</b>                             | <b>3 (2 OCD, 1 PTSD)</b> | <b>6 (5 MDD, 1 MDD + BD)</b>                                                                    | <b>10 (6 SCZ, 4 BD)</b>                                                                            | <b>0</b>                                                          | <b>1 (AN)</b>                                                                   |

**eAppendix 5. Details of the identified systematic reviews**

**Table e5.1. Details of the identified systematic reviews.**

| First Author | Year | Ref. | Disorder      | Studies included (eligible only)*                                                                                                                                                                                                                                                                                                                                                                                                   | Pre-registered? |
|--------------|------|------|---------------|-------------------------------------------------------------------------------------------------------------------------------------------------------------------------------------------------------------------------------------------------------------------------------------------------------------------------------------------------------------------------------------------------------------------------------------|-----------------|
| Di Lodovico  | 2021 | [1]  | anorexia      | <u>N = 9</u><br>Armougoum 2009; Million 2013; Kleiman 2015; Morita 2015; Mack 2016; Mörtl 2017; Borgo 2017; Hanachi 2018; Hata 2019                                                                                                                                                                                                                                                                                                 | no              |
| Schalla      | 2019 | [2]  | anorexia      | <u>N = 5</u><br>Morita et al., 2015; Mörtl et al., 2017; Kleiman et al., 2015; Borgo et al., 2017; Mack et al., 2016                                                                                                                                                                                                                                                                                                                | no              |
| Schwensen    | 2018 | [3]  | anorexia      | <u>N = 7</u><br>Mörkl et al., 2017; Borgo et al 2017; Kleiman et al 2015; Morita et al 2015; Amougom et al 2009; Million et al 2013; Mack et al 2016                                                                                                                                                                                                                                                                                | Yes             |
| Simpson      | 2021 | [4]  | depression    | <u>N = 18</u><br>Aizawa et al (2016); Chahwan et al. (2019); Chen, Li et al. (2018); Chen, Zheng et al. (2018); Chen et al. (2019); Chung et al. (2019); Huang et al. (2018); Jiang et al. (2015); Kelly et al. (2016); Lai et al., (2019); Lin et al. (2017); Liu et al. (2016); Mason et al., (2020); Naseribafrouei et al. (2014); Rong et al. (2019); Valles- Colomer et al. (2019); Vinberg et al. (2019); Zheng et al. (2016) | no              |
|              |      |      | anxiety       | <u>N = 3</u><br>Mason et al., (2020); Jiang et al. (2018); Chen et al. (2019)                                                                                                                                                                                                                                                                                                                                                       |                 |
| Fond         | 2020 | [5]  | depression    | <u>N = 7</u><br>Chen et al. 2018; Kelly et al. 2016; Liu et al. 2016; Jiang et al. 2015; Madan et al. 2020; Mason et al. 2020; Naseribafrouei et al., 2014                                                                                                                                                                                                                                                                          | no              |
|              |      |      | schizophrenia | <u>N = 0</u>                                                                                                                                                                                                                                                                                                                                                                                                                        |                 |
| Li           | 2020 | [6]  | depression    | <u>N= 9</u><br>Naseribafrouei et al., 2014; Jiang et al., 2015; Kelly et al., 2016; Zheng et al., 2016; Huang et al., 2018; Chen et al., 2018b; Chung et al., 2019; Chen et al., 2018a; Rong et al., 2019                                                                                                                                                                                                                           | no              |
| Simpson      | 2020 | [7]  | depression    | <u>N = 2</u><br>Liu et al. (2016), Aizawa et al. (2016)                                                                                                                                                                                                                                                                                                                                                                             | no              |
| Sanada       | 2020 | [8]  | depression    | <u>N = 10</u><br>Chen 2018a; Chen 2018b; Huang 2018; Lin 2017; Aizawa 2016; Kelly 2016; Liu 2016; Zheng 2016; Jiang 2015; Naseribafrouei 2014                                                                                                                                                                                                                                                                                       | no              |



|            |      |      |                  |                                                                                                                                                                                                      |     |
|------------|------|------|------------------|------------------------------------------------------------------------------------------------------------------------------------------------------------------------------------------------------|-----|
| Vindegaard | 2020 | [9]  | depression       | N = 9<br>Chen et al., 2018; Huang et al., 2018; Stevens et al., 2018; Lin et al., 2017; Aizawa et al., 2016; Kelly et al., 2016; Zheng et al., 2016; Jiang et al., 2015; Naseribafrouei et al., 2014 | yes |
|            |      |      | bipolar disorder | N = 4<br>Coello et al., 2019; Aizawa et al., 2018; Painold et al., 2018; Evans et al., 2017                                                                                                          |     |
|            |      |      | psychosis        | N = 4<br>Nguyen et al., 2018; Schwarz et al., 2018; Shen et al., 2018; Yuan et al., 2018                                                                                                             |     |
| Cheung     | 2019 | [10] | depression       | N = 6<br>Naseribafrouei et al 2014; Jiang et al 2015; Aizawa et al 2016; Zheng et al 2016; Lin et al 2017; Chen et al 2018                                                                           | no  |
| Barandouzi | 2020 | [11] | depression       | N = 9<br>Chen et al 2018; Zheng et al 2016; Liu et al 2016; Chen et al 2018; Jiang et al 2015; Naserbafrouei et al 2014; Lin et al 2017; Aizawa et al 2016; Kelly et al 2016;                        | no  |
| Nguyen     | 2019 | [12] | bipolar disorder | N = 4<br>Painold et al., 2019; Evans et al 2017; Coello et al., 2019; Aizawa et al., 2018                                                                                                            | no  |
|            |      |      | psychosis        | N = 5<br>Schwarz et al., 2018; Yuan et al., 2018; Nagamine et al 2018; Nguyen et al 2019; Shen et al 2018                                                                                            |     |
| Nguyen     | 2018 | [13] | bipolar disorder | N = 1<br>Evans et al 2017                                                                                                                                                                            | no  |
|            |      |      | psychosis        | N = 1<br>Schwarz et al. (2017)                                                                                                                                                                       |     |
| Cuomo      | 2018 | [14] | psychosis        | N = 3<br>Schwarz et al. (2018); Shen et al (2018); Yuan et al (2018)                                                                                                                                 | no  |
| Kraeuter   | 2020 | [15] | psychosis        | N = 5<br>Schwarz et al 2018; Shen et al 2018; Yuan et al 2018; Nguyen et al 2018; Zheng 2019                                                                                                         | no  |
| Jurek      | 2020 | [16] | autism, ADHD     | N = 1<br>Aarts et al. 2017                                                                                                                                                                           | yes |

\*after duplicate studies from these systematic reviews were removed, the total number of studies added through this route was 39.

#### eReferences:

1. Di Lodovico L, Mondot S, Doré J, Mack I, Hanachi M, Gorwood P. Anorexia nervosa and gut microbiota: A systematic review and quantitative synthesis of pooled microbiological data. *Prog Neuropsychopharmacol Biol Psychiatry*. 2020 Sep 22;110114.
2. Schalla MA, Stengel A. Gastrointestinal alterations in anorexia nervosa - A systematic review. *Eur Eat Disord Rev*. 2019;27(5):447–61.
3. Schwensen HF, Kan C, Treasure J, Høiby N, Sjøgren M. A systematic review of studies on the faecal microbiota in anorexia nervosa: future research may need to include microbiota from the small intestine. *Eat Weight Disord*. 2018 Aug;23(4):399–418.

4. Simpson CA, Mu A, Haslam N, Schwartz OS, Simmons JG. Feeling down? A systematic review of the gut microbiota in anxiety/depression and irritable bowel syndrome. *Journal of Affective Disorders* [Internet]. 2020 Apr [cited 2020 Jun 2];266:429–46. Available from: <https://linkinghub.elsevier.com/retrieve/pii/S0165032719325777>
5. Fond GB, Lagier JC, Honore S, Lancon C, Korchia T, De Verville PLS, Llorca PM, Auquier P, Guedj E, Boyer L. Microbiota-orientated treatments for major depression and schizophrenia. *Nutrients* [Internet]. 2020;12(4).
6. Li S, Hua D, Wang Q, Yang L, Wang X, Luo A, Yang C. The Role of Bacteria and Its Derived Metabolites in Chronic Pain and Depression: Recent Findings and Research Progress. *Int J Neuropsychopharmacol*. 2020 10;23(1):26–41.
7. Simpson CA, Diaz-Arteche C, Eliby D, Schwartz OS, Simmons JG, Cowan CSM. The gut microbiota in anxiety and depression - A systematic review. *Clin Psychol Rev*. 2020 Oct 29;83:101943.
8. Sanada K, Nakajima S, Kurokawa S, Barceló-Soler A, Ikuse D, Hirata A, Yoshizawa A, Tomizawa Y, Salas-Valero M, Noda Y, Mimura M, Iwanami A, Kishimoto T. Gut microbiota and major depressive disorder: A systematic review and meta-analysis. *J Affect Disord*. 2020 01;266:1–13.
9. Vindegaard N, Speyer H, Nordentoft M, Rasmussen S, Benros ME. Gut microbial changes of patients with psychotic and affective disorders: A systematic review. *Schizophr Res*. 2020 Jan 14;
10. Cheung SG, Goldenthal AR, Uhlemann A-C, Mann JJ, Miller JM, Sublette ME. Systematic Review of Gut Microbiota and Major Depression. *Front Psychiatry* [Internet]. 2019 Feb 11 [cited 2020 Jun 2];10:34. Available from: <https://www.frontiersin.org/article/10.3389/fpsy.2019.00034/full>
11. Barandouzi ZA, Starkweather AR, Henderson WA, Gyamfi A, Cong XS. Altered Composition of Gut Microbiota in Depression: A Systematic Review. *Front Psychiatry*. 2020;11:541.
12. Nguyen TT, Hathaway H, Kosciolk T, Knight R, Jeste DV. Gut microbiome in serious mental illnesses: A systematic review and critical evaluation. *Schizophr Res*. 2019 Sep 5;
13. Nguyen TT, Kosciolk T, Eyler LT, Knight R, Jeste DV. Overview and systematic review of studies of microbiome in schizophrenia and bipolar disorder. *J Psychiatr Res*. 2018;99:50–61.
14. Cuomo A, Maina G, Rosso G, Beccarini Crescenzi B, Bolognesi S, Di Muro A, Giordano N, Goracci A, Neal SM, Nitti M, Pieraccini F, Fagiolini A. The Microbiome: A New Target for Research and Treatment of Schizophrenia and its Resistant Presentations? A Systematic Literature Search and Review. *Front Pharmacol* [Internet]. 2018 Oct 15 [cited 2021 Mar 17];9. Available from: <https://www.ncbi.nlm.nih.gov/pmc/articles/PMC6196757/>
15. Kraeuter A-K, Phillips R, Sarnyai Z. The Gut Microbiome in Psychosis From Mice to Men: A Systematic Review of Preclinical and Clinical Studies. *Front Psychiatry*. 2020;11:799.
16. Jurek L, Sevil M, Jay A, Schröder C, Baghdadli A, Héry-Arnaud G, Geoffray M-M. Is there a dysbiosis in individuals with a neurodevelopmental disorder compared to controls over the course of development? A systematic review. *Eur Child Adolesc Psychiatry*. 2020 May 8;

## eAppendix 6. Detailed characteristics of the included studies

The 59 studies provided 64 case-control comparisons capturing 2643 patients and 2336 controls (Table 6.1). Most studies (n=32) were conducted in East Asia (China, Taiwan or Japan), 24 in westernised populations (grouped on the basis of typical diet and lifestyle: USA, Canada, Europe, Australia, New Zealand) and one in Africa. All but one<sup>12</sup> used formal diagnostic criteria to define their population. Studies were similar in exclusion criteria such as major medical and gastrointestinal conditions, pregnancy and recent consumption of antibiotics (except four studies in which antibiotics weren't mentioned<sup>17,25,28,33</sup>). Recent probiotic consumption was excluded in 35/59 studies, was not mentioned in 21, and three studies included a small number of participants taking probiotics<sup>3,27,50</sup>. Few studies imposed restrictions on diet such as no major changes in the months preceding enrolment<sup>10,19,35,36</sup> or no weight loss, vegetarian or vegan diets<sup>14,15,18,20,31</sup>. Two studies matched groups according to diet<sup>39,44</sup> and one controlled dietary intake<sup>55</sup>. Despite its known impact on microbial communities<sup>60</sup>, smoking was generally not controlled: only three studies excluded smokers<sup>18,20,38</sup> and five controlled for it during analyses<sup>19,23,28,45,51</sup>. Amplicon 16S rRNA sequencing was used in 44 studies, although choice of hypervariable region (V1-V9) varied, seven studies used shotgun metagenomics to sample all microbial genes, nine studies used either qPCR or RT-qPCR to target a pre-specified range of microbial taxa, and one study employed metaproteomic analysis (Table 6.1).

**Supplementary Table 6.1.** Key sample and methodology characteristics of case-control comparisons of the gut microbiome by disorder.

| Disorder   | Study                                   | Country | Definition of disorder Stage | Sample size n   | Mean Age            | % Female   | Mean BMI            | % Smokers        | % Patients on medication | Sequencing          | Diversity assessments                                                                  |
|------------|-----------------------------------------|---------|------------------------------|-----------------|---------------------|------------|---------------------|------------------|--------------------------|---------------------|----------------------------------------------------------------------------------------|
| <b>MDD</b> | Naseribafrouei et al. 2014 <sup>1</sup> | Norway  | ICD-10                       | P: 37<br>HC: 18 | P: 49.2<br>HC: 46.1 | 56%        | P: 25.9<br>HC: 24.7 | nr               | Nr                       | 16S rRNA<br>nr      | α: Observed sp., Simpsons<br>β: not measured                                           |
| <b>MDD</b> | Jiang et al. 2015 <sup>2</sup>          | China   | DSM-IV                       | P: 29<br>HC: 30 | P: 25.3<br>HC: 26.8 | 38%<br>50% | P: 20.3<br>HC: 19.6 | P: 10%<br>HC: 7% | most, total<br>% nr      | 16S rRNA<br>V1-V3   | α: Chao1, ACE, Shannon, Simpson, evenness; β: UniFrac (unweighted)                     |
| <b>MDD</b> | Aizawa et al. 2016 <sup>3</sup>         | Japan   | DSM-IV                       | P: 43<br>HC: 57 | P: 39.4<br>HC: 42.8 | 41%<br>61% | P: 23.2<br>HC: 22.3 | nr               | 65%                      | RT-qPCR<br>16S rRNA | α: not measured<br>β: not measured                                                     |
| <b>MDD</b> | Kelly et al. 2016 <sup>4</sup>          | Ireland | DSM-IV                       | P: 34<br>HC: 33 | P: 45.8<br>HC: 45.8 | 38%        | P: 26.2<br>HC: 24.6 | P: 13%<br>HC: 3% | 96%                      | 16S rRNA<br>nr      | α: Observed sp., Chao1, Shannon, PD<br>β: UniFrac (weighted & unweighted), Bray-Curtis |
| <b>MDD</b> | Liu et al. 2016 <sup>5</sup>            | China   | DSM-IV                       | P: 15<br>HC: 20 | P: 44.8<br>HC: 43.9 | 69%        | P: 22.0<br>HC: 22.0 | nr               | 0%                       | 16S rRNA<br>V1-V3   | α: Observed sp., Chao1, Shannon, PD<br>β: measured, nr                                 |

| Disorder | Study                             | Country      | Definition of disorder Stage | Sample size n                          | Mean Age                                     | % Female          | Mean BMI                                    | % Smokers         | % Patients on medication   | Sequencing           | Diversity assessments                                               |
|----------|-----------------------------------|--------------|------------------------------|----------------------------------------|----------------------------------------------|-------------------|---------------------------------------------|-------------------|----------------------------|----------------------|---------------------------------------------------------------------|
| MDD      | Zheng et al. 2016 <sup>6</sup>    | China        | DSM-IV                       | P: 58<br>HC: 63                        | P: 40.6<br>HC: 41.8                          | 63%               | P: 22.0<br>HC: 22.6                         | P: 16%<br>H: 21%  | 67%                        | 16S rRNA V3-V5       | α: Observed sp., Shannon, Simpson, PD<br>β: Bray-Curtis             |
| MDD      | Lin et al. 2017 <sup>7</sup>      | China        | DSM-IV                       | P: 10<br>HC: 10                        | P: 36.2<br>HC: 38.1                          | 60%               | P: 23.8<br>HC: 24.2                         | P:40%<br>HC:30%   | 100%                       | 16S rRNA V3-V4       | α: measured, nr<br>β: UniFrac (weighted)                            |
| MDD      | Chen et al. 2018a <sup>8</sup>    | China        | HAMD                         | P: 44<br>HC: 44                        | P: 40.9<br>HC: 43.4                          | 55%               | P: 22.1<br>HC: 22.6                         | nr                | 0% (drug-naïve)            | 16S rRNA seq V3-V5   | α: Observed sp., Shannon, Simpson, PD<br>β: UniFrac (nr), PLS-DA    |
| MDD      | Chen et al. 2018b <sup>9</sup>    | China        | DSM-IV                       | P: 10<br>HC: 10                        | P: 43.9<br>HC:39.6                           | 50%               | P: 23.5<br>HC: 22.6                         | nr                | 20%                        | Meta-proteomics      | α: not measured<br>β: not measured                                  |
| MDD      | Huang et al. 2018 <sup>10</sup>   | China        | ICD-10                       | P: 27<br>HC: 27                        | P: 48.7<br>HC: 42.3                          | 74%               | P: 23.8<br>HC: 23.4                         | nr                | Nr                         | 16S rRNA V3-V4       | α: Chao1, ACE, Shannon, PD<br>β: UniFrac (weighted & unweighted)    |
| MDD      | Chahwan et al. 2019 <sup>11</sup> | Australia    | M.I.N.I                      | P: 68<br>HC: 20                        | P: 36.1<br>HC: 40.0                          | 70%               | nr                                          | P: 25%<br>HC: 11% | 0%                         | 16S rRNA V3-V4       | α: Observed sp., Chao1, Shannon<br>β: UniFrac (weighted)            |
| MDD      | Valles-Colomer 2019 <sup>12</sup> | Belgium / NL | GP & self-report             | P: 80<br>HC: 70                        | 50.9                                         | 55%               | 24.9                                        | nr                | 50%                        | 16S rRNA nr          | α: not measured<br>β: not measured                                  |
| MDD      | Chung et al. 2019 <sup>13</sup>   | Taiwan       | DSM-5                        | P: 36<br>HC: 37                        | P: 45.8<br>HC: 41.2                          | 70%               | P: 22.8<br>HC: 24                           | P: 19%<br>HC: 3%  | 86%                        | 16S rRNA V3-V4       | α: Shannon<br>β: UniFrac (weighted)                                 |
| MDD      | Lai et al. 2019 <sup>14</sup>     | China        | DSM-5                        | P: 26<br>HC: 29                        | P: 43.7<br>HC: 39.4                          | P: 69%<br>HC: 55% | P: 27.2<br>HC: 21.1                         | nr                | 81%                        | Shotgun Metagenomics | α: Shannon, Fisher<br>β: Bray-Curtis                                |
| MDD      | Rong et al. 2019 <sup>15</sup>    | China        | DSM-5                        | P: 31<br>HC: 30                        | P: 41.6<br>HC: 39.5                          | P: 71%<br>HC:53%  | P: 21.5<br>HC: 22.0                         | nr                | 74%                        | Shotgun Metagenomics | α: Chao 1, Shannon, Inverse Simpson, Gm coefficient; β: Bray-Curtis |
| MDD      | Mason et al. 2020 <sup>16</sup>   | USA          | DSM-IV                       | P: 14<br>HC: 10                        | P: 41.9<br>HC: 33.0                          | P:79%<br>HC: 60%  | P: 31.0<br>HC: 25.6                         | nr                | 64%                        | 16S rRNA V4          | α: Shannon<br>β: UniFrac (weighted)                                 |
| MDD      | Chen et al. 2020 <sup>17</sup>    | China        | DSM-IV                       | Young P: 25<br>HC: 27<br>Mid-age P: 45 | Young P: 24.0<br>HC: 25.0<br>Mid-age P: 45.0 | 72%               | Young P: 22.1<br>HC: 21.5<br>Mid-age P:22.6 | nr                | Young: 28%<br>Mid-age: 31% | 16SrRNA V3-V5        | α: Chao1, ACE<br>β: OPLS-DA                                         |

| Disorder             | Study                             | Country | Definition of disorder Stage | Sample size n              | Mean Age            | % Female           | Mean BMI            | % Smokers       | % Patients on medication | Sequencing           | Diversity assessments                                                                |
|----------------------|-----------------------------------|---------|------------------------------|----------------------------|---------------------|--------------------|---------------------|-----------------|--------------------------|----------------------|--------------------------------------------------------------------------------------|
|                      |                                   |         |                              | HC: 44                     | HC: 47.2            |                    | HC: 23.2            |                 |                          |                      |                                                                                      |
| <b>MDD</b>           | Chen et al. 2021 <sup>18</sup>    | China   | DSM-5                        | P: 62<br>HC: 46            | P: 39.6<br>HC: 34.0 | 100%               | P: 22.0<br>HC: 22.2 | 0%              | 0%                       | 16SrRNA V3-V4        | α: Observed sp., Chao1, ACE, Shannon, Simpson;<br>β: UniFrac (weighted & unweighted) |
| <b>MDD</b>           | Yang et al. 2020 <sup>19</sup>    | China   | DSM-IV                       | P: 156<br>HC: 155          | P: 29.6<br>HC: 29.1 | P: 36 %<br>HC: 54% | P: 22.3<br>HC: 22.4 | nr              | 24%                      | Shotgun Metagenomics | α: Chao1, Shannon, Inv. Shannon<br>β: Bray-Curtis                                    |
| <b>MDD</b>           | Liu et al. 2020 <sup>20</sup>     | USA     | DSM-5                        | P: 43<br>HC: 47            | P: 21.9<br>HC: 22.1 | P: 88%<br>HC: 72%  | nr                  | 0%              | 65%                      | 16SrRNA V4           | α: Observed sp., Shannon, PD<br>β: UniFrac (weighted & unweighted), Bray-Curtis      |
| <b>MDD</b>           | Stevens et al. 2020 <sup>21</sup> | USA     | DSM-IV                       | P: 20<br>HC: 20            | P & HC: 34          | P: 50%<br>HC: 70%  | nr                  | nr              | 75%                      | nr                   | α: Chao1, Shannon<br>β: Bray-Curtis                                                  |
| <b>MDD + ANX</b>     | Stevens et al. 2018 <sup>22</sup> | USA     | DSM-5                        | P: 22<br>HC: 28            | nr                  | nr                 | nr                  | nr              | Nr                       | nr                   | α: not measured<br>β: not measured                                                   |
| <b>MDD &amp; ANX</b> | Mason et al. 2020 <sup>16</sup>   | USA     | DSM-IV                       | P: 38<br>HC: 10            | P:39.2<br>HC:33.0   | P: 82%<br>HC: 60%  | P: 20.4<br>HC: 25.6 | nr              | 42%                      | 16S rRNA V4          | α: Shannon<br>β: UniFrac (weighted)                                                  |
| <b>MDD &amp; BD</b>  | Vinberg et al. 2019 <sup>23</sup> | Denmark | ICD-8 & ICD-10 remission     | P: 74<br>HC: 25            | P: 37.7<br>HC: 37.0 | 77%                | P: 26.5<br>HC: 24.5 | P > HC,<br>% nr | 61%                      | 16SrRNA V3-V4        | α: Observed sp., Shannon<br>β: generalized UniFrac                                   |
| <b>MDD &amp; BD</b>  | Jiang et al. 2020 <sup>24</sup>   | China   | DSM-IV                       | MDD:14<br>BD: 10<br>HC: 16 | P: 37.2<br>HC: 35.8 | 45%                | P: 23.6<br>HC: 22.3 | P: 8%<br>HC: 6% | most, total<br>% nr      | 16SrRNA V1-V3        | α: Chao1, ACE, Shannon, Simpson<br>β: UniFrac (weighted & unweighted), Bray-Curtis   |
| <b>BD</b>            | Evans et al. 2017 <sup>25</sup>   | USA     | DSM-IV                       | P:115<br>HC: 64            | P: 50.2<br>HC: 48.6 | 73%                | P: 29.3<br>HC: 26.0 | nr              | most, total<br>% nr      | 16SrRNA V4           | α: not measured<br>β: Yue & Clayton                                                  |
| <b>BD</b>            | Painold et al. 2018 <sup>26</sup> | Austria | DSM-IV, current              | P: 32<br>HC: 10            | P: 41.3<br>HC: 31.4 | 44%                | P: 28.4<br>HC: 24.3 | nr              | 100%                     | 16SrRNA V1-V2        | α: Observed sp., Chao1, Shannon, Simpson<br>β: UniFrac (weighted & unweighted)       |

| Disorder   | Study                              | Country | Definition of disorder Stage  | Sample size n    | Mean Age            | % Female | Mean BMI            | % Smokers         | % Patients on medication | Sequencing                              | Diversity assessments                                                                             |
|------------|------------------------------------|---------|-------------------------------|------------------|---------------------|----------|---------------------|-------------------|--------------------------|-----------------------------------------|---------------------------------------------------------------------------------------------------|
|            |                                    |         | depression or euthymia        |                  |                     |          |                     |                   |                          |                                         |                                                                                                   |
| <b>BD</b>  | Aizawa et al. 2019 <sup>27</sup>   | Japan   | DSM-IV, any episode           | P: 39<br>HC: 58  | P: 40.3<br>HC: 43.1 | 56%      | P: 23.9<br>HC: 22.4 | nr                | 92%                      | RT qPCR for 16S/23S rRNA                | α: not measured<br>β: not measured                                                                |
| <b>BD</b>  | Rong et al. 2019 <sup>15</sup>     | China   | DSM-5, current depression     | P: 30<br>HC: 30  | P: 38.4<br>HC: 39.5 | 52%      | P: 21.9<br>HC: 22.0 | nr                | 83%                      | Shotgun Metagenomics                    | α: Chao 1, Shannon, Inv. Simpson, Gm coefficient<br>β: Bray-Curtis                                |
| <b>BD</b>  | Coello et al. 2019 <sup>28</sup>   | Denmark | ICD-10, any episode           | P: 113<br>HC: 77 | P: 31<br>HC: 29     | 62%      | P: 24.8<br>HC: 24.2 | P: 36%<br>HC: 11% | 88%                      | 16SrRNA V3-V4                           | α: Observed sp., Shannon<br>β: UniFrac (weighted & unweighted)                                    |
| <b>BD</b>  | McIntyre et al. 2019 <sup>29</sup> | Canada  | DSM-5, current depression     | P: 23<br>HC: 23  | P: 45<br>HC: 43.8   | 70%      | P: 30<br>HC: 26     | P: 21%<br>HC: 9%  | nr                       | 16SrRNA V3                              | α: Observed sp., Shannon, Inv. Simpson<br>β: Bray-Curtis                                          |
| <b>BD</b>  | Hu et al. 2019 <sup>30</sup>       | China   | DSM-IV-TR, current depression | P: 52<br>HC: 45  | P: 24.2<br>HC: 36.3 | 48%      | P: 21.6<br>HC: 22.4 | nr                | 0%                       | 16SrRNA V3-V4                           | α: Observed sp., Chao1, Shannon, Simpson, Inv. Simpson, ICE<br>β: UniFrac (weighted & unweighted) |
| <b>BD</b>  | Lai et al. 2021 <sup>31</sup>      | China   | DSM-5, current depression     | P: 25<br>HC: 28  | P: 36.9<br>HC: 39.2 | 48%      | P: 22.1<br>HC: 21.1 | nr                | 80%                      | Shotgun Metagenomics                    | α: Shannon, Simpson, Fisher<br>β: Bray-Curtis                                                     |
| <b>BD</b>  | Lu et al. 2019 <sup>32</sup>       | China   | DSM-IV-TR, current depression | P: 36<br>HC: 27  | P: 32.6<br>HC: 28.9 | 43%      | P: 22.2<br>HC: 21.8 | 0%                | 0%                       | qPCR                                    | α: not measured<br>β: not measured                                                                |
| <b>SCZ</b> | Nguyen et al. 2019 <sup>33</sup>   | USA     | DSM-IV-TR                     | P: 25<br>HC: 25  | P: 52.9<br>HC: 54.7 | 44%      | P: 31.8<br>HC: 28.9 | P: 56%<br>HC: 4%  | 100%                     | 16SrRNA V4                              | α: Observed sp., Shannon, Faith's PD<br>β: UniFrac (unweighted), Bray-Curtis                      |
| <b>SCZ</b> | Schwarz et al. 2018 <sup>34</sup>  | Finland | DSM-IV; FEP                   | P: 28<br>HC: 16  | P: 25.9<br>HC: 27.1 | 43%      | P: 23.8<br>HC: 23.9 | nr                | 93%                      | qPCR for 16S rRNA primers, Metagenomics | α: not measured<br>β: not measured                                                                |
| <b>SCZ</b> | Shen et al. 2018 <sup>35</sup>     | China   | ICD-10                        | P: 64<br>HC: 53  | P: 42<br>HC: 39     | 44%      | P: 23.5<br>HC: 23.1 | P: 19%<br>HC: 23% | 100%                     | 16SrRNA V3-V4                           | α: Observed sp., Chao1, ACE, Shannon, Simpson, Faith's PD<br>β: UniFrac (unweighted)              |

| Disorder | Study                           | Country | Definition of disorder Stage | Sample size n                | Mean Age            | % Female          | Mean BMI            | % Smokers             | % Patients on medication          | Sequencing                        | Diversity assessments                                                                     |
|----------|---------------------------------|---------|------------------------------|------------------------------|---------------------|-------------------|---------------------|-----------------------|-----------------------------------|-----------------------------------|-------------------------------------------------------------------------------------------|
| SCZ      | Yuan et al. 2018 <sup>36</sup>  | China   | DSM-IV; FEP                  | P: 41<br>HC: 41              | P: 23.1<br>HC: 24.7 | 44%               | P:20.5<br>HC: 20.8  | P: 5%<br>HC: 6%       | 0%                                | qPCR for 16S rRNA primers         | α: not measured<br>β: not measured                                                        |
| SCZ      | Zheng et al. 2019 <sup>37</sup> | China   | DSM-IV                       | P: 63<br>HC: 69              | P: 43.5<br>HC: 40.0 | P:33%<br>HC: 48%  | P: 22.9<br>HC: 23.2 | nr                    | 92%                               | 16SrRNA V3-V4                     | α: Chao 1, Shannon<br>β: PLS-DA                                                           |
| SCZ      | Pan et al. 2020 <sup>38</sup>   | China   | DSM-IV                       | P: 29<br>HC: 29              | P: 34.9<br>HC: 34.8 | 34%               | P: 23.7<br>HC: 23.5 | 0%                    | 90%                               | 16SrRNA V3-V4                     | α: Observed sp., Chao1, ACE, Shannon, Simpson, Faith's PD<br>β: UniFrac (unweighted)      |
| SCZ      | Zhu et al. 2020 <sup>39</sup>   | China   | DSM-IV                       | P: 90<br>HC: 81              | P: 28.6<br>HC: 32.3 | 49%               | P: 20.6<br>HC: 21.7 | P: 30%<br>HC: 25%     | 0%                                | Shotgun Metagenomics              | α: Shannon<br>β: Bray-Curtis                                                              |
| SCZ      | Li et al. 2020 <sup>40</sup>    | China   | DSM-IV-TR                    | P: 82<br>HC: 80              | P: 42.2<br>HC: 41.0 | 47%               | P:24.5<br>HC: 23.0  | P:21%<br>HC: 5%       | 91%                               | 16SrRNA V4                        | α: Observed Sp., Evenness, Shannon, Faith's PD;<br>β: Bray-Curtis                         |
| SCZ      | Ma et al. 2020 <sup>41</sup>    | China   | DSM-IV; FEP & SCZ            | FEP: 40<br>SCZ: 85<br>HC: 69 | P: 24.2<br>HC:23.1  | 46%               | nr                  | nr                    | FEP: 0% (drug-naïve)<br>SCZ: 100% | 16SrRNA V4                        | α: Chao1, Shannon<br>β: UniFrac (weighted & unweighted)                                   |
| SCZ      | Zhang et al. 2020 <sup>42</sup> | China   | DSM-IV; FEP                  | P:10<br>HC:16                | P: 37.6<br>HC: 35.8 | 42%               | P: 23.3<br>HC:22.3  | P: 10%<br>HC: 6.3%    | 0% (drug naïve)                   | 16SrRNA nr                        | α: Observed sp., Chao1, Shannon, Simpson; β: UniFrac (weighted & unweighted), Bray-Curtis |
| SCZ      | Xu et al., 2020 <sup>43</sup>   | China   | DSM-5                        | P: 84<br>HC: 84              | P: 35.0<br>HC: 35.0 | 43%               | P:22<br>HC:23.1     | nr                    | 98%                               | 16SrRNA V4 & Shotgun Metagenomics | α: Chao1<br>β: non-metric multidimensional scaling                                        |
| ANX      | Jiang et al. 2018 <sup>44</sup> | China   | DSM-IV                       | P: 40<br>HC: 36              | P: 33.4<br>HC: 35.6 | P: 75%<br>HC: 64% | P:21.7<br>HC: 21.4  | P: 2.5%<br>HC: 3%     | 70%                               | 16SrRNA V3-V4                     | α: Observed sp., Chao1, ACE, Shannon, Simpson; β: UniFrac unweighted                      |
| ANX      | Chen et al. 2019 <sup>45</sup>  | China   | DSM-5                        | P: 36<br>HC: 24              | P: 46.1<br>HC: 41.8 | 57%               | P: 23.1<br>HC: 22.5 | P: 19.4%<br>HC: 16.7% | nr                                | 16SrRNA V3-V4                     | α: Observed sp., Chao1, ACE, Shannon, Simpson<br>β: UniFrac (weighted & unweighted)       |

| Disorder   | Study                                          | Country | Definition of disorder Stage | Sample size n   | Mean Age              | % Female           | Mean BMI            | % Smokers | % Patients on medication | Sequencing            | Diversity assessments                                                                                                                            |
|------------|------------------------------------------------|---------|------------------------------|-----------------|-----------------------|--------------------|---------------------|-----------|--------------------------|-----------------------|--------------------------------------------------------------------------------------------------------------------------------------------------|
| <b>ANX</b> | Mason et al. 2020 <sup>16</sup>                | USA     | DSM-IV                       | P: 8<br>HC: 10  | P: 40.0<br>HC: 33.0   | P: 100%<br>HC: 60% | P: 33.3<br>HC: 25.6 | nr        | 62%                      | 16SrRNA V4            | α: Shannon<br>β: UniFrac weighted                                                                                                                |
| <b>AN</b>  | Armougom et al. 2009 <sup>46</sup>             | France  | DSM-IV                       | P: 9<br>HC: 20  | P: 19-36<br>HC: 13-68 | nr                 | P: 12.7<br>HC: 20.7 | nr        | nr                       | RT qPCR               | α: not measured<br>β: not measured                                                                                                               |
| <b>AN</b>  | Million et al. 2013 <sup>47</sup>              | France  | DSM-IV                       | P: 15<br>HC: 76 | P: 27.3<br>HC: 49.5   | P: 93%<br>HC: 43%  | P: 13.5<br>HC: 22.4 | nr        | nr                       | qPCR                  | α: not measured<br>β: not measured                                                                                                               |
| <b>AN</b>  | Kleiman et al. 2015 <sup>48</sup>              | USA     | DSM-IV-TR                    | P: 16<br>HC: 12 | P: 28.0<br>HC: 29.8   | 100%               | P: 16.2<br>HC: 21.5 | nr        | nr                       | 16SrRNA V1-V3         | α: Observed sp., Chao1<br>β: UniFrac (weighted & unweighted)                                                                                     |
| <b>AN</b>  | Morita et al. 2015 <sup>49</sup>               | Japan   | DSM-IV-TR                    | P: 25<br>HC: 21 | P: 30.0<br>HC: 31.5   | 100%               | P: 12.8<br>HC: 20.5 | nr        | nr                       | qPCR for 16S/23S rRNA | α: not measured<br>β: not measured                                                                                                               |
| <b>AN</b>  | Mack et al. 2016 <sup>50</sup>                 | Germany | 'Diagnosis' (not specified)  | P: 55<br>HC: 55 | P: 23.8<br>HC: 23.7   | 100%               | P: 15.3<br>HC: 21.6 | nr        | nr                       | 16SrRNA V4            | α: Observed sp., Chao 1, Shannon<br>β: UniFrac (weighted & unweighted), Bray-Curtis                                                              |
| <b>AN</b>  | Mörkl et al. 2017 <sup>51</sup>                | Austria | ICD-10                       | P: 18<br>HC: 26 | P: 22.4<br>HC: 24.9   | 100%               | P: 15.<br>HC: 21.9  | 25%       | nr                       | 16SrRNA V1-V2         | α: Observed sp., Chao 1, Shannon<br>β: UniFrac (weighted & unweighted)                                                                           |
| <b>AN</b>  | Borgo et al. 2017 <sup>52</sup>                | Italy   | DSM-5                        | P: 15<br>HC: 15 | P: 25.6<br>HC: 24.4   | 100%               | P: 13.9<br>HC: 22.1 | nr        | nr                       | 16SrRNA V3-V4         | α: measured, nr<br>β: measured, nr                                                                                                               |
| <b>AN</b>  | Hanachi et al. 2018 <sup>53</sup>              | France  | DSM-IV-TR                    | P: 33<br>HC: 22 | P: 32<br>HC: 36       | 100%               | P: 11.7<br>HC: 21.0 | nr        | nr                       | 16SrRNA V3-V4         | α: Chao 1, Shannon<br>β: UniFrac (weighted & unweighted)                                                                                         |
| <b>AN</b>  | Hata et al. 2019 <sup>54</sup>                 | Japan   | DSM-IV-TR restrictive only   | P: 4<br>HC: 4   | P: 23.0<br>HC: 25.3   | 100%               | P: 13.7<br>HC: 21.6 | nr        | nr                       | 16SrRNA V3-V4         | α: Observed sp., Chao 1, Shannon<br>β: UniFrac (weighted & unweighted)                                                                           |
| <b>AN</b>  | Monteleone et al. 2021 <sup>55</sup>           | Italy   | DSM-5                        | P: 21<br>HC: 20 | P: 21.7<br>HC: 23.0   | 100%               | P: 14.6<br>HC: 20.3 | nr        | nr                       | 16SrRNA V4            | α: Chao1, Fisher<br>β: non-metric multidimensional scaling                                                                                       |
| <b>OCD</b> | Domenech et al. <i>pre-print</i> <sup>56</sup> | Spain   | DSM-IV                       | P: 38<br>HC: 33 | P: 40.2<br>HC: 36.0   | 53%                | nr                  | nr        | nr                       | 16SrRNA V3-V4         | α: Observed sp., Chao 1, Shannon, Simpson, Inv. Simpson, Faith's PD<br>β: UniFrac (weighted & unweighted), Bray-Curtis, Jensen-Shannon, Canberra |



| Disorder    | Study                              | Country      | Definition of disorder Stage | Sample size n   | Mean Age            | % Female         | Mean BMI            | % Smokers        | % Patients on medication | Sequencing    | Diversity assessments                                                                                       |
|-------------|------------------------------------|--------------|------------------------------|-----------------|---------------------|------------------|---------------------|------------------|--------------------------|---------------|-------------------------------------------------------------------------------------------------------------|
| <b>OCD</b>  | Turna et al. 2020 <sup>57</sup>    | Canada       | DSM-5                        | P: 21<br>HC: 22 | P: 31.0<br>HC:29.3  | 54%              | P: 24.6<br>HC: 23.2 | nr               | 0%                       | 16SrRNA V3    | α: Observed sp., Chao 1, Inv. Simpson, Shannon;<br>β: UniFrac (weighted & unweighted), Bray-Curtis, Jaccard |
| <b>PTSD</b> | Hemmings et al. 2017 <sup>58</sup> | South Africa | DSM-5                        | P: 18<br>HC: 22 | P: 42.0<br>HC: 38.7 | P: 14%<br>HC: 7% | P:28.5<br>HC:28.6   | P: 50%<br>HC:42% | 33%                      | 16SrRNA V3-V4 | α: Observed sp., Chao1, Shannon, Faith's PD<br>β: UniFrac (weighted & unweighted), Bray Curtis              |
| <b>ADHD</b> | Aarts et al. 2017 <sup>59</sup>    | NL           | DSM-IV                       | P: 19<br>HC:77  | P: 19.5<br>HC: 27.1 | P:32%<br>HC:47%  | P: 23.8<br>HC: 23.0 | nr               | nr                       | 16SrRNA V3-V4 | α: Observed sp., Chao1, Shannon, Faith's PD<br>β: not measured                                              |

ADHD attention deficit hyperactivity disorder, AN anorexia nervosa, ANX anxiety, BD bipolar disorder, OCD obsessive compulsive disorder, MDD major depressive disorder, PTSD post-traumatic stress disorder, SCZ schizophrenia and psychosis, BMI body mass index, P patient, HC healthy control, NL Netherlands, ICD International Classification of Diseases, DSM Diagnostic and Statistical Manual of Mental Disorders, MINI Mini-International Neuropsychiatric Interview, FEP first episode psychosis, seq sequencing, (RT) qPCR (real time) quantitative polymerase chain reaction, ACE abundance-based coverage estimator, ICE incidence-based estimator, Faith's PD Faith's phylogenetic diversity, PLS-DA partial least squares discriminant analysis, OPLS-DA orthogonal projections to latent structures discriminant analysis, n number, nr not reported

## eReferences:

1. Naseribafrouei A, Hestad K, Avershina E, et al. Correlation between the human fecal microbiota and depression. *Neurogastroenterol Motil Off J Eur Gastrointest Motil Soc.* 2014;26(8):1155-1162. doi:10.1111/nmo.12378
2. Jiang H, Ling Z, Zhang Y, et al. Altered fecal microbiota composition in patients with major depressive disorder. *Brain Behav Immun.* 2015;48:186-194. doi:10.1016/j.bbi.2015.03.016
3. Aizawa E, Tsuji H, Asahara T, et al. Possible association of Bifidobacterium and Lactobacillus in the gut microbiota of patients with major depressive disorder. *J Affect Disord.* 2016;202:254-257. doi:10.1016/j.jad.2016.05.038
4. Kelly JR, Borre Y, O' Brien C, et al. Transferring the blues: Depression-associated gut microbiota induces neurobehavioural changes in the rat. *J Psychiatr Res.* 2016;82:109-118. doi:10.1016/j.jpsychires.2016.07.019

5. Liu Y, Zhang L, Wang X, et al. Similar Fecal Microbiota Signatures in Patients With Diarrhea-Predominant Irritable Bowel Syndrome and Patients With Depression. *Clin Gastroenterol Hepatol*. 2016;14(11):1602-1611.e5. doi:10.1016/j.cgh.2016.05.033
6. Zheng P, Zeng B, Zhou C, et al. Gut microbiome remodeling induces depressive-like behaviors through a pathway mediated by the host's metabolism. *Mol Psychiatry*. 2016;21(6):786-796. doi:10.1038/mp.2016.44
7. Lin P, Ding B, Feng C, et al. Prevotella and Klebsiella proportions in fecal microbial communities are potential characteristic parameters for patients with major depressive disorder. *J Affect Disord*. 2017;207:300-304. doi:10.1016/j.jad.2016.09.051
8. Chen J, Zheng P, Liu Y, et al. Sex differences in gut microbiota in patients with major depressive disorder. *Neuropsychiatr Dis Treat*. 2018;14:647-655. doi:10.2147/NDT.S159322
9. Chen Z, Li J, Gui S, et al. Comparative metaproteomics analysis shows altered fecal microbiota signatures in patients with major depressive disorder. *Neuroreport*. 2018;29(5):417-425. doi:10.1097/WNR.0000000000000985
10. Huang Y, Shi X, Li Z, et al. Possible association of Firmicutes in the gut microbiota of patients with major depressive disorder. *Neuropsychiatr Dis Treat*. 2018;14:3329-3337. doi:10.2147/NDT.S188340
11. Chahwan B, Kwan S, Isik A, van Hemert S, Burke C, Roberts L. Gut feelings: A randomised, triple-blind, placebo-controlled trial of probiotics for depressive symptoms. *J Affect Disord*. 2019;253:317-326. doi:10.1016/j.jad.2019.04.097
12. Valles-Colomer M, Falony G, Darzi Y, et al. The neuroactive potential of the human gut microbiota in quality of life and depression. *Nat Microbiol*. 2019;4(4):623-632. doi:10.1038/s41564-018-0337-x
13. Chung Y-CE, Chen H-C, Chou H-CL, et al. Exploration of microbiota targets for major depressive disorder and mood related traits. *J Psychiatr Res*. 2019;111:74-82. doi:10.1016/j.jpsychires.2019.01.016
14. Lai W-T, Deng W-F, Xu S-X, et al. Shotgun metagenomics reveals both taxonomic and tryptophan pathway differences of gut microbiota in major depressive disorder patients. *Psychol Med*. Published online November 5, 2019;1-12. doi:10.1017/S0033291719003027
15. Rong H, Xie X, Zhao J, et al. Similarly in depression, nuances of gut microbiota: Evidences from a shotgun metagenomics sequencing study on major depressive disorder versus bipolar disorder with current major depressive episode patients. *J Psychiatr Res*. 2019;113:90-99. doi:10.1016/j.jpsychires.2019.03.017

16. Mason BL, Li Q, Minhajuddin A, et al. Reduced anti-inflammatory gut microbiota are associated with depression and anhedonia. *J Affect Disord.* 2020;266:394-401. doi:10.1016/j.jad.2020.01.137
17. Chen J-J, He S, Fang L, et al. Age-specific differential changes on gut microbiota composition in patients with major depressive disorder. *Aging.* 2020;12(3):2764-2776. doi:10.18632/aging.102775
18. Chen Y, Xue F, Yu S, et al. Gut microbiota dysbiosis in depressed women: The association of symptom severity and microbiota function. *J Affect Disord.* 2021;282:391-400. doi:10.1016/j.jad.2020.12.143
19. Yang J, Zheng P, Li Y, et al. Landscapes of bacterial and metabolic signatures and their interaction in major depressive disorders. *Sci Adv.* 2020;6(49):eaba8555. doi:10.1126/sciadv.aba8555
20. Liu RT, Rowan-Nash AD, Sheehan AE, et al. Reductions in anti-inflammatory gut bacteria are associated with depression in a sample of young adults. *Brain Behav Immun.* 2020;88:308-324. doi:10.1016/j.bbi.2020.03.026
21. Stevens BR, Roesch L, Thiago P, et al. Depression phenotype identified by using single nucleotide exact amplicon sequence variants of the human gut microbiome. *Mol Psychiatry.* Published online January 27, 2020:1-11. doi:10.1038/s41380-020-0652-5
22. Stevens BR, Goel R, Seungbum K, et al. Increased human intestinal barrier permeability plasma biomarkers zonulin and FABP2 correlated with plasma LPS and altered gut microbiome in anxiety or depression. *Gut.* 2018;67(8):1555-1557. doi:10.1136/gutjnl-2017-314759
23. Vinberg M, Ottesen NM, Meluken I, et al. Remitted affective disorders and high familial risk of affective disorders associate with aberrant intestinal microbiota. *Acta Psychiatr Scand.* 2019;139(2):174-184. doi:https://doi.org/10.1111/acps.12976
24. Jiang H, Pan L, Zhang X, Zhang Z, Zhou Y, Ruan B. Altered gut bacterial–fungal interkingdom networks in patients with current depressive episode. *Brain Behav.* 2020;10(8):e01677. doi:https://doi.org/10.1002/brb3.1677
25. Evans SJ, Bassis CM, Hein R, et al. The gut microbiome composition associates with bipolar disorder and illness severity. *J Psychiatr Res.* 2017;87:23-29. doi:10.1016/j.jpsychires.2016.12.007
26. Painold A, Mörkl S, Kashofer K, et al. A step ahead: Exploring the gut microbiota in inpatients with bipolar disorder during a depressive episode. *Bipolar Disord.* 2019;21(1):40-49. doi:10.1111/bdi.12682
27. Aizawa E, Tsuji H, Asahara T, et al. Bifidobacterium and Lactobacillus Counts in the Gut Microbiota of Patients With Bipolar Disorder and Healthy Controls. *Front Psychiatry.* 2019;9:730. doi:10.3389/fpsy.2018.00730

28. Coello K, Hansen TH, Sørensen N, et al. Gut microbiota composition in patients with newly diagnosed bipolar disorder and their unaffected first-degree relatives. *Brain Behav Immun*. 2019;75:112-118. doi:10.1016/j.bbi.2018.09.026
29. McIntyre RS, Subramaniapillai M, Shekotikhina M, et al. Characterizing the gut microbiota in adults with bipolar disorder: a pilot study. *Nutr Neurosci*. Published online May 28, 2019:1-8. doi:10.1080/1028415X.2019.1612555
30. Hu S, Li A, Huang T, et al. Gut Microbiota Changes in Patients with Bipolar Depression. *Adv Sci*. 2019;6(14):1900752. doi:https://doi.org/10.1002/advs.201900752
31. Lai W, Zhao J, Xu S, et al. Shotgun metagenomics reveals both taxonomic and tryptophan pathway differences of gut microbiota in bipolar disorder with current major depressive episode patients. *J Affect Disord*. 2021;278:311-319. doi:10.1016/j.jad.2020.09.010
32. Lu Q, Lai J, Lu H, et al. Gut Microbiota in Bipolar Depression and Its Relationship to Brain Function: An Advanced Exploration. *Front Psychiatry*. 2019;10. doi:10.3389/fpsy.2019.00784
33. Nguyen TT, Hathaway H, Kosciolk T, Knight R, Jeste DV. Gut microbiome in serious mental illnesses: A systematic review and critical evaluation. *Schizophr Res*. Published online September 5, 2019. doi:10.1016/j.schres.2019.08.026
34. Schwarz E, Maukonen J, Hyytiäinen T, et al. Analysis of microbiota in first episode psychosis identifies preliminary associations with symptom severity and treatment response. *Schizophr Res*. 2018;192:398-403. doi:10.1016/j.schres.2017.04.017
35. Shen Y, Xu J, Li Z, et al. Analysis of gut microbiota diversity and auxiliary diagnosis as a biomarker in patients with schizophrenia: A cross-sectional study. *Schizophr Res*. 2018;197:470-477. doi:10.1016/j.schres.2018.01.002
36. Yuan X, Zhang P, Wang Y, et al. Changes in metabolism and microbiota after 24-week risperidone treatment in drug naïve, normal weight patients with first episode schizophrenia. *Schizophr Res*. 2018;201:299-306. doi:10.1016/j.schres.2018.05.017
37. Zheng P, Zeng B, Liu M, et al. The gut microbiome from patients with schizophrenia modulates the glutamate-glutamine-GABA cycle and schizophrenia-relevant behaviors in mice. *Sci Adv*. 2019;5(2):eaau8317. doi:10.1126/sciadv.aau8317
38. Pan R, Zhang X, Gao J, Yi W, Wei Q, Su H. Analysis of the diversity of intestinal microbiome and its potential value as a biomarker in patients with schizophrenia: A cohort study. *Psychiatry Res*. 2020;291:113260. doi:10.1016/j.psychres.2020.113260
39. Zhu F, Ju Y, Wang W, et al. Metagenome-wide association of gut microbiome features for schizophrenia. *Nat Commun*. 2020;11(1):1612. doi:10.1038/s41467-020-15457-9

40. Li S, Zhuo M, Huang X, et al. Altered gut microbiota associated with symptom severity in schizophrenia. *PeerJ*. 2020;8. doi:10.7717/peerj.9574
41. Ma X, Asif H, Dai L, et al. Alteration of the gut microbiome in first-episode drug-naïve and chronic medicated schizophrenia correlate with regional brain volumes. *J Psychiatr Res*. 2020;123:136-144. doi:10.1016/j.jpsychires.2020.02.005
42. Zhang X, Pan L-Y, Zhang Z, Zhou Y-Y, Jiang H-Y, Ruan B. Analysis of gut mycobiota in first-episode, drug-naïve Chinese patients with schizophrenia: A pilot study. *Behav Brain Res*. 2020;379:112374. doi:10.1016/j.bbr.2019.112374
43. Xu R, Wu B, Liang J, et al. Altered gut microbiota and mucosal immunity in patients with schizophrenia. *Brain Behav Immun*. 2020;85:120-127. doi:10.1016/j.bbi.2019.06.039
44. Jiang H-Y, Zhang X, Yu Z-H, et al. Altered gut microbiota profile in patients with generalized anxiety disorder. *J Psychiatr Res*. 2018;104:130-136. doi:10.1016/j.jpsychires.2018.07.007
45. Chen Y-H, Bai J, Wu D, et al. Association between fecal microbiota and generalized anxiety disorder: Severity and early treatment response. *J Affect Disord*. 2019;259:56-66. doi:10.1016/j.jad.2019.08.014
46. Armougom F, Henry M, Vialettes B, Raccach D, Raoult D. Monitoring Bacterial Community of Human Gut Microbiota Reveals an Increase in Lactobacillus in Obese Patients and Methanogens in Anorexic Patients. *PLOS ONE*. 2009;4(9):e7125. doi:10.1371/journal.pone.0007125
47. Million M, Angelakis E, Maraninchi M, et al. Correlation between body mass index and gut concentrations of Lactobacillus reuteri , Bifidobacterium animalis , Methanobrevibacter smithii and Escherichia coli. *Int J Obes*. 2013;37(11):1460-1466. doi:10.1038/ijo.2013.20
48. Kleiman SC, Watson HJ, Bulik-Sullivan EC, et al. The Intestinal Microbiota in Acute Anorexia Nervosa and During Renourishment: Relationship to Depression, Anxiety, and Eating Disorder Psychopathology. *Psychosom Med*. 2015;77(9):969–981. doi:10.1097/PSY.0000000000000247
49. Morita C, Tsuji H, Hata T, et al. Gut Dysbiosis in Patients with Anorexia Nervosa. *PLOS ONE*. 2015;10(12):e0145274. doi:10.1371/journal.pone.0145274
50. Mack I, Cuntz U, Grämer C, et al. Weight gain in anorexia nervosa does not ameliorate the faecal microbiota, branched chain fatty acid profiles, and gastrointestinal complaints. *Sci Rep*. 2016;6:26752. doi:10.1038/srep26752

51. Mörkl S, Lackner S, Müller W, et al. Gut microbiota and body composition in anorexia nervosa inpatients in comparison to athletes, overweight, obese, and normal weight controls. *Int J Eat Disord*. 2017;50(12):1421-1431. doi:10.1002/eat.22801
52. Borgo F, Riva A, Benetti A, et al. Microbiota in anorexia nervosa: The triangle between bacterial species, metabolites and psychological tests. Sanz Y, ed. *PLOS ONE*. 2017;12(6):e0179739. doi:10.1371/journal.pone.0179739
53. Hanachi M, Manichanh C, Schoenenberger A, et al. Altered host-gut microbes symbiosis in severely malnourished anorexia nervosa (AN) patients undergoing enteral nutrition: An explicative factor of functional intestinal disorders? *Clin Nutr Edinb Scotl*. 2019;38(5):2304-2310. doi:10.1016/j.clnu.2018.10.004
54. Hata T, Miyata N, Takakura S, et al. The Gut Microbiome Derived From Anorexia Nervosa Patients Impairs Weight Gain and Behavioral Performance in Female Mice. *Endocrinology*. 2019;160(10):2441-2452. doi:10.1210/en.2019-00408
55. Monteleone AM, Troisi J, Fasano A, et al. Multi-omics data integration in anorexia nervosa patients before and after weight regain: A microbiome-metabolomics investigation. *Clin Nutr Edinb Scotl*. 2021;40(3):1137-1146. doi:10.1016/j.clnu.2020.07.021
56. Domènech L, Willis J, Alemany M, et al. Changes in the stool and oropharyngeal microbiome in obsessive-compulsive disorder. *medRxiv*. Published online May 28, 2020:2020.05.26.20113779. doi:10.1101/2020.05.26.20113779
57. Turna J, Grosman Kaplan K, Anglin R, et al. The gut microbiome and inflammation in obsessive-compulsive disorder patients compared to age- and sex-matched controls: a pilot study. *Acta Psychiatr Scand*. 2020;142(4):337-347. doi:10.1111/acps.13175
58. Hemmings SMJ, Malan-Müller S, van den Heuvel LL, et al. The Microbiome in Posttraumatic Stress Disorder and Trauma-Exposed Controls: An Exploratory Study. *Psychosom Med*. 2017;79(8):936-946. doi:10.1097/PSY.0000000000000512
59. Aarts E, Ederveen THA, Naaijen J, et al. Gut microbiome in ADHD and its relation to neural reward anticipation. *PloS One*. 2017;12(9):e0183509. doi:10.1371/journal.pone.0183509
60. Savin Z, Kivity S, Yonath H, Yehuda S. Smoking and the intestinal microbiome. *Arch Microbiol*. 2018;200(5):677-684. doi:10.1007/s00203-018-1506-2

## eAppendix 7. Stool sample processing methods in the included studies

**Table e7.1. Stool sample collection, storage and DNA extraction procedures of the included studies.**

| Study                      | Collection & handling by participant                                                                                                     | Long-term storage                                                        | DNA extraction method                                                                                                                                                    |
|----------------------------|------------------------------------------------------------------------------------------------------------------------------------------|--------------------------------------------------------------------------|--------------------------------------------------------------------------------------------------------------------------------------------------------------------------|
| Naseribafrouei et al. 2014 | Outpatient samples frozen at -20 °C in home freezer upon collection and transported at below zero. Inpatients stored directly at -70 °C. | at -70 °C until use                                                      | MagTM mini kit (LGC), following the manufacturer recommendations                                                                                                         |
| Jiang et al. 2015          | Sterile plastic cups were used to collect samples and were kept in an icebox                                                             | at -80 °C within 15 min of collection, until use                         | QIAamp® DNA Stool Mini Kit (QIAGEN), following manufacturer instructions, with additional glass-bead beating steps on a Mini-beadbeater (FastPrep; Thermo Electron Corp) |
| Aizawa et al. 2016         | collected with RNA stabilizer and stored at room temperature or at 4°C until sent to lab                                                 | -                                                                        | Total RNA fractions were extracted (Yakult Central Institute), method not reported                                                                                       |
| Kelly et al. 2016          | Collected in plastic containers containing an anaerobic generator AnaeroGen Compact Oxoid sachet                                         | Homogenized, aliquoted and stored at -80 °C until further use            | QIAamp DNA Stool Mini Kit (QIAGEN)                                                                                                                                       |
| Liu et al. 2016            | -                                                                                                                                        | Immediately stored at -80 °C until use                                   | PowerSoil DNA Isolation Kit (MoBio), following Human Microbiome Project recommendations                                                                                  |
| Zheng et al. 2016          | -                                                                                                                                        | Immediately stored at -80 °C until use                                   | PowerSoil DNA Isolation Kit (MoBio), following standard protocols                                                                                                        |
| Lin et al. 2017            | -                                                                                                                                        | Immediately stored at -70 °C until use                                   | Tiagen DNA Stool Mini Kit (Tiagen Biotech), following manufacturer protocols                                                                                             |
| Chen et al. 2018a          | -                                                                                                                                        | at -80 °C until use                                                      | PowerSoil DNA kit following standard protocol                                                                                                                            |
| Chen et al. 2018b          | Sterile plastic cups were used to collect samples                                                                                        | at -80 °C until use                                                      | Tandem mass spectra were extracted and analyzed using Mascot (Matrix Science) against a combined Swiss prot-human (20151226) and TrEMBL bacteria database                |
| Huang et al. 2018          | sterile containers were used to collect samples                                                                                          | Immediately stored at -80 °C until use                                   | PowerSoil DNA Kit (Missouri Biotechnology Association)                                                                                                                   |
| Chahwan et al. 2019        | kept on ice or refrigerated before delivery to study staff                                                                               | Samples placed at 4 °C and aliquots stored at -80 °C within several days | PowerFecal DNA Isolation Kit (MoBio), following manufacturer instructions                                                                                                |

| Study                 | Collection & handling by participant                                           | Long-term storage                                                                     | DNA extraction method                                                                             |
|-----------------------|--------------------------------------------------------------------------------|---------------------------------------------------------------------------------------|---------------------------------------------------------------------------------------------------|
| Valles-Colomer 2019   | Frozen at -18°C at home and cool transported to collection point               | stored at -18°C until transport on dry ice to the research facility for -80°C storage | PowerMicrobiome RNA Isolation kit (MoBio Laboratories)                                            |
| Chung et al. 2019     | delivered in 4 °C to staff                                                     | and -80 °C until use                                                                  | QIAamp DNA Stool Mini Kit (QIAGEN) or phenol–chloroform extraction method                         |
| Lai et al. 2019       | -                                                                              | immediately stored at -80 °C until use                                                | StoolGen DNA kit (CWBiotech Co)                                                                   |
| Rong et al. 2019      | -                                                                              | immediately stored at -80 °C until shipped to lab                                     | StoolGen DNA kit (CWBiotech Co)                                                                   |
| Chen et al. 2020      | -                                                                              | -                                                                                     | standard PowerSoil kit protocol                                                                   |
| Chen et al. 2021      | Sterile plastic cups were used to collect samples                              | stored at -80 °C within 30 min of collection until use                                | Qiagen QIAamp DNA Stool Mini Kit (Qiagen) according to manufacturer's instructions                |
| Yang et al. 2020      | -                                                                              | -                                                                                     | E.Z.N.A. Soil DNA Kit (Omega Bio-tek, Norcross, GA, USA) according to manufacturer's instructions |
| Liu et al. 2020       | OMNIgene•GUT stool collection kits                                             | at -80 °C until use                                                                   | ZymoBIOMICS 96 DNA Kit (Zymo Research) according to manufacturer's instructions                   |
| Stevens et al. 2020   | collected with OMNIgeneGUT fecal collection kits (DNAGenotek, Ontario, Canada) | at -80 °C until use                                                                   | Stool Extraction Kit following the manufacturer's instructions (Omega Bio-tek, Doraville, CA).    |
| Stevens et al. 2018 [ | -                                                                              | at -80 °C until use                                                                   | -                                                                                                 |
| Vinberg et al. 2019   | stool collection kits (Sarsted Kit sterile)                                    | at -80 °C within 24-72 hours, until use                                               | NucleoSpin 96 Soil kit (Macherey-Nagel)                                                           |
| Jiang et al. 2020     | collected in a sterile plastic cup at the hospital and refrigerated            | stored at -80 °C within 30 min of collection until use                                | FastDNATM SPIN Kit for Feces (MP Biomedicals) according to manufacturer's instructions            |
| Evans et al. 2017     | Home stool collection kits (DNA Genotek, Ontario CA)                           | at -80 °C until use                                                                   | PowerMag soil isolation kit (MoBio)                                                               |
| Painold et al. 2018   | -                                                                              | - 20°C until use                                                                      | PowerLyzer PowerSoil DNA Isolation Kit (MoBio)                                                    |
| Aizawa et al. 2019    | collected with RNA stabilizer and stored at 4°C at home                        | at 4°C until use                                                                      | Total RNA fractions were extracted (Yakult Central Institute), method not reported                |
| Coello et al. 2019    | collected with OMNIgeneGUT fecal collection kits (DNAGenotek, Ontario, Canada) | at -80 °C until use                                                                   | NucleoSpin ® 96 Soil kit                                                                          |



| Study                | Collection & handling by participant                                                                | Long-term storage                                 | DNA extraction method                                                                                                                                      |
|----------------------|-----------------------------------------------------------------------------------------------------|---------------------------------------------------|------------------------------------------------------------------------------------------------------------------------------------------------------------|
| McIntyre et al. 2019 | Collected in sterile screw-capped sample jar and frozen in home freezer                             | Processed upon receipt; back-ups stored at -80 °C | Using in-house protocol on a MagMax™ robot (Thermo Fischer Scientific, Waltham, Mass)                                                                      |
| Hu et al. 2019       |                                                                                                     | at -80°C within 30 min of collection, until use   | PSP Spin Stool DNA Plus Kit (Strattec, Germany) according to the manufacturer's instructions.                                                              |
| Lai et al. 2021      | -                                                                                                   | At -80 until use                                  | StoolGen DNA kit (CWBiotech Co., Beijing, China)                                                                                                           |
| Lu et al. 2019       | -                                                                                                   | at -80°C within 30 min of collection, until use   | Qiagen Stool Kit (Qiagen, Hilden, Germany), according to a modified protocol for cell lysis                                                                |
| Nguyen et al. 2019   | home stool collection kits (BD SWUBE Dual Swab Collection System; BD Worldwide)                     | at -80 °C until use                               | Earth Microbiome Project (EMP), modified from MagAttract® PowerSoil® DNA KF Kit                                                                            |
| Schwarz et al. 2018  | Collected in a larger sampling bowl, from which duplicate samples were transferred to smaller tubes | at -80 °C until use                               | FastDNA Spin Kit for Soil (QBIogene)                                                                                                                       |
| Shen et al. 2018     | -                                                                                                   | at -80 °C until use                               | PowerSoil DNA kit (MoBio)                                                                                                                                  |
| Yuan et al. 2018     | -                                                                                                   | -                                                 | QIAamp Fast DNA Stool Mini Kit (QIAGEN)                                                                                                                    |
| Zheng et al. 2019    | -                                                                                                   | immediately stored at -80 °C until use            | QIAamp DNA Stool Mini Kit (QIAGEN, Hilden, Germany).                                                                                                       |
| Pan et al. 2020      | Collected and immediately transported to lab with ice packs                                         | at -80 °C until use                               | E.Z.N.A. soil kit (Omega Bio-tek, Norcross, GA, U.S.) according to manufacturer's instructions                                                             |
| Zhu et al. 2020      | -                                                                                                   | -                                                 | -                                                                                                                                                          |
| Li et al. 2020       | -                                                                                                   | at -80 °C until use                               | MOBIO PowerSoil DNA Isolation Kit 12,888–100 protocol                                                                                                      |
| Ma et al. 2020       | collected in sterile plastic containers                                                             | immediately stored at -80 °C until use            | QIAamp DNA Mini Kit (QIAGEN, Hilden, Germany) according to the manufacturer's instructions                                                                 |
| Zhang et al. 2020    | Sterile plastic cups were used to collect samples and were kept in an icebox                        | at -80 °C within 30 min of collection, until use  | FastDNA™ SPIN Kit for Feces (MP Biomedical Inc., Santa Ana, CA, USA) according to the manufacturer's instructions with additional glass-bead beating steps |
| Xu et al., 2020      | Collected in disposable sterile potty and transferred to tubes then frozen at -20°C                 | Same or next day moved to -80 °C until use        | StoolGen fecal DNA extraction kit (CWBiotech, Beijing, China)                                                                                              |
| Jiang et al. 2018    | Sterile plastic cups were used to collect samples and were kept in an icebox                        | at -80 °C within 30 min of collection, until use  | QIAamp DNA Stool Mini Kit (QIAGEN), following manufacturer instructions, with the addition of a glass-                                                     |

| Study                            | Collection & handling by participant                                                                                                                                              | Long-term storage                                | DNA extraction method                                                                                          |
|----------------------------------|-----------------------------------------------------------------------------------------------------------------------------------------------------------------------------------|--------------------------------------------------|----------------------------------------------------------------------------------------------------------------|
|                                  |                                                                                                                                                                                   |                                                  | bead beating step on a Mini-beadbeater (FastPrep; Thermo Electron Corp)                                        |
| Chen et al. 2019                 | Sterile plastic cups were used to collect samples                                                                                                                                 | at -80 °C within 15 min of collection, until use | QIAamp DNA Stool Mini Kit (QIAGEN), following manufacturer instructions                                        |
| Mason et al. 2020                | Frozen in home freezer after collection                                                                                                                                           | at -80 °C until use                              | Crude DNA extracts were treated with RNaseA (QIAGEN) and column-purified (PCR Purification Kit, QIAGEN)        |
| Armougom et al. 2009             | -                                                                                                                                                                                 | -                                                | NucleoSpinH Tissue Mini Kit according to manufacturer's instructions                                           |
| Million et al. 2013              | collected using sterile plastic containers and transported "as soon as possible" to the lab                                                                                       | at -80°C until use                               | NucleoSpin® Tissue Mini Kit (information taken from cross-referenced source [1])                               |
| Kleiman et al. 2015              | collected by nurses trained in collection protocols                                                                                                                               | at -80°C until use                               | Qiagen DNeasy® Blood and Tissue extraction kit (Qiagen, Valencia, CA, USA)                                     |
| Morita et al. 2015               | Collected in tubes containing the RNA stabilizer                                                                                                                                  | at 4°C until use                                 | Total RNA fractions were extracted (Yakult Central Institute), method not reported                             |
| Mack et al. 2016                 | Collected with a stool-collecting kit (Süsse Labortechnik, Gudensberg, Germany) from eight different sites of the stool                                                           | immediately stored at -80 °C until use           | PSP Spin Stool Kit (Stratec Molecular, Berlin, Germany) according to the manufacturers' instructions           |
| Mörkl et al. 2017                | Collected with the PSP spin stool DNA stool collection kit (Stratec, Birkenfeld, Germany)                                                                                         | immediately stored at -20 °C until use           | PowerLyzer PowerSoil DNA Isolation Kit (MO BIO Laboratories, CA) according to the manufacturer's instructions. |
| Borgo et al. 2017                | -                                                                                                                                                                                 | at -80°C until use                               | Spin stool DNA kit (Stratec Molecular, Berlin, Germany), according to the manufacturer's instructions          |
| Hanachi et al. 2018              | -                                                                                                                                                                                 | -                                                | Standard Operating Procedure 07 of the IHMS                                                                    |
| Hata et al. 2019                 | Collected and sealed in a plastic bag containing a disposable oxygen-absorbing and carbon dioxide-generating agent and transported on ice to the laboratory within several hours. | -                                                | -                                                                                                              |
| Monteleone et al. 2021           | -                                                                                                                                                                                 | at -80°C until use                               | PowerSoil DNA isolation kit (Qiagen, Germantown, MD, USA)                                                      |
| Domenech et al. <i>pre-print</i> | collected in Stool Collection Tubes (Stratec 14 Molecular)                                                                                                                        | At -20°C until use                               | PSP Spin Stool 15 DNA Basic Kit (Stratec Molecular)                                                            |

| Study                | Collection & handling by participant                                                                                  | Long-term storage                | DNA extraction method                                                                                                                                                                                                 |
|----------------------|-----------------------------------------------------------------------------------------------------------------------|----------------------------------|-----------------------------------------------------------------------------------------------------------------------------------------------------------------------------------------------------------------------|
| Turna et al. 2020    | collected and transferred into a sterile screw capped sample jar and placed in a household freezer (for up to 1 week) | -                                | -                                                                                                                                                                                                                     |
| Hemmings et al. 2017 | -                                                                                                                     | -                                | PSP® Spin Stool DNA Plus Kit (STRATEC Molecular, Birkenfeld, Germany) according to the manufacturer's protocol 2 ("Isolation of total DNA from 1.4 ml stabilized stool homogenate with enrichment of bacterial DNA"). |
| Aarts et al. 2017    | pea-sized amount stored it in a 50ml Falcon tube, then stored at 4°C until delivery to site                           | At -80°C within 24hrs, until use | DNeasy1Blood and Tissue Kit (Qiagen, Venlo, The Netherlands)                                                                                                                                                          |

- information not available

#### eReferences not included elsewhere:

1. Dridi B, Henry M, El Khéchine A, et al. High Prevalence of Methanobrevibacter smithii and Methanosphaera stadtmanae Detected in the Human Gut Using an Improved DNA Detection Protocol. *PLoS One*; 4. Epub ahead of print 17 September 2009. DOI: 10.1371/journal.pone.0007063.

**eAppendix 8. Publication bias assessment for the alpha diversity meta-analyses**

**A. Chao1**

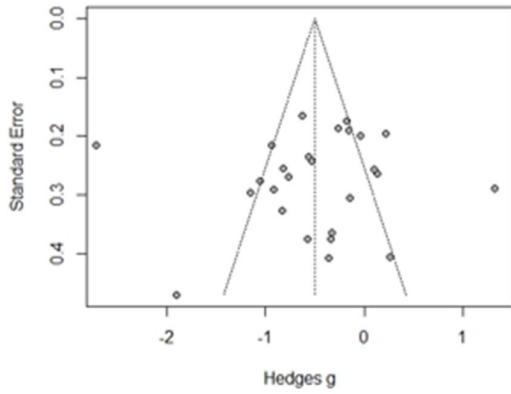

**B. Observed species**

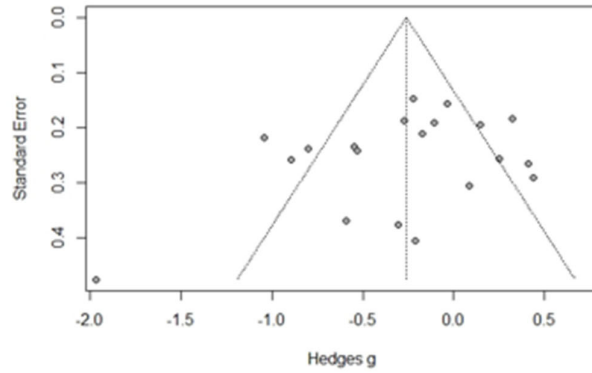

**C. Phylogenetic diversity**

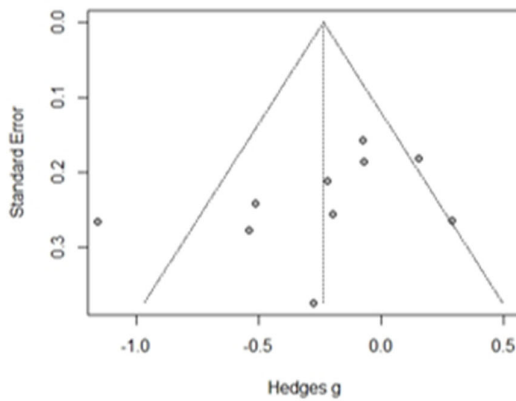

**D. Shannon index**

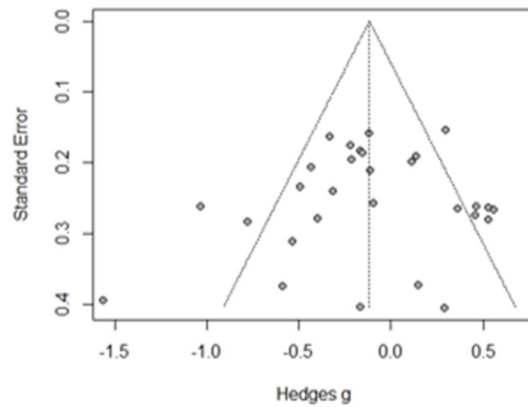

**E. Simpson index**

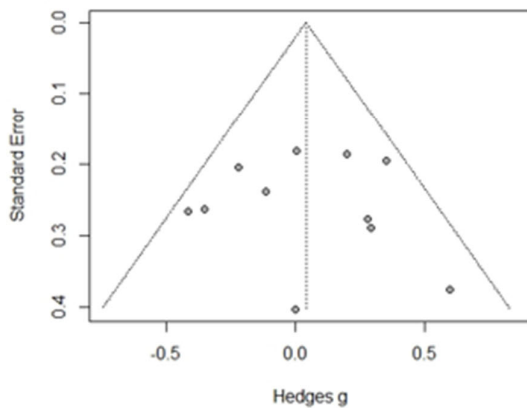

**Figure e8.1.** Funnel plots assessing publication bias in the meta-analyses of alpha diversity. **A.** Chao1, **B.** Observed species, **C.** Phylogenetic diversity, **D.** Shannon, **E.** Simpson index.

## eAppendix 9. Beta diversity

**Table e9.1.** Methodology and findings of the included studies assessing beta diversity for the patient vs. control group comparison.

| Disorder              | Study    | Year  | Metric                                                       | Analysis                  | Finding                                                    |
|-----------------------|----------|-------|--------------------------------------------------------------|---------------------------|------------------------------------------------------------|
| MDD                   | Jiang    | 2015  | Unweighted Unifrac                                           | -                         | no sig. difference                                         |
| MDD                   | Kelly    | 2016  | Bray-Curtis<br>Unweighted Unifrac<br>Weighted Unifrac        | PCoA, Adonis<br>PERMANOVA | sig. different<br>sig. different<br>sig. different         |
| MDD                   | Zheng    | 2016  | Bray-Curtis                                                  | PCoA                      | sig. different                                             |
| MDD                   | Lin      | 2017  | Weighted Unifrac                                             | PCoA                      | sig. different                                             |
| MDD                   | Chen     | 2018a | Unifrac (nr)                                                 | PCoA, PLS-DA              | sig. different                                             |
| MDD                   | Huang    | 2018  | Unweighted Unifrac<br>Weighted Unifrac                       | PCoA                      | sig. different<br>sig. different                           |
| MDD                   | Chawan   | 2019  | Weighted Unifrac                                             | PCoA,<br>PERMANOVA        | no sig. difference                                         |
| MDD                   | Chung    | 2019  | Weighted Unifrac                                             | PERMANOVA                 | sig. different                                             |
| MDD                   | Lai      | 2019  | Bray-Curtis                                                  | PCoA,<br>PERMANOVA        | sig. different                                             |
| MDD                   | Chen     | 2020  | -                                                            | OPLS-DA                   | sig. different                                             |
| MDD                   | Chen     | 2021  | Unweighted Unifrac<br>Weighted Unifrac                       | PCoA                      | sig. different<br>sig. different                           |
| MDD                   | Yang     | 2020  | Bray-Curtis                                                  | PERMANOVA                 | sig. different                                             |
| MDD                   | Liu      | 2020  | Unweighted Unifrac<br>Weighted Unifrac<br>Bray - Curtis      | PCoA                      | sig. different<br>sig. different<br>sig. different         |
| MDD                   | Stevens  | 2020  | Bray-Curtis (unfiltered data)<br>Bray-Curtis (filtered data) | PERMANOVA                 | no sig. difference<br>sig. different                       |
| MDD, ANX,<br>MDD +ANX | Mason    | 2020  | Weighted Unifrac                                             | PCoA                      | no sig. difference                                         |
| MDD,<br>BD            | Jiang    | 2020  | Unweighted Unifrac<br>Weighted Unifrac<br>Bray - Curtis      | PCoA                      | no sig. difference<br>no sig. difference<br>sig. different |
| MDD, BD               | Rong     | 2019  | Bray-Curtis                                                  | PCoA                      | no sig. difference                                         |
| MDD+BD                | Vinberg  | 2019  | Generalized UniFrac                                          | PCoA,<br>PERMANOVA        | no sig. difference                                         |
| BD                    | Evans    | 2017  | Yue & Clayton distance                                       | PCoA, AMOVA               | sig. different                                             |
| BD                    | Painold  | 2018  | Unweighted Unifrac<br>Weighted Unifrac                       | PCoA                      | no sig. difference                                         |
| BD                    | Coello   | 2019  | Weighted Unifrac<br>Unweighted Unifrac                       | -                         | no sig. difference<br>sig. different                       |
| BD                    | Mcintyre | 2019  | Bray-Curtis                                                  | PCoA                      | no sig. difference                                         |
| BD                    | Hu       | 2019  | Unweighted Unifrac<br>Weighted Unifrac                       | PCoA                      | sig. different                                             |
| BD                    | Lai      | 2021  | Bray-Curtis                                                  | PERMANOVA                 | sig. different                                             |
| SCZ                   | Nguyen   | 2019  | Unweighted Unifrac<br>Bray-Curtis                            | PCoA                      | sig. different<br>sig. different                           |
| SCZ                   | Shen     | 2018  | Unweighted Unifrac                                           | PCoA, ANOSIM              | sig. different                                             |
| SCZ                   | Zheng    | 2019  | -                                                            | PLS-DA                    | sig. different                                             |
| SCZ                   | Pan      | 2020  | Unweighted Unifrac                                           | PCoA, ANOSIM              | no sig. difference                                         |

|      |            |                  |                                                                                     |                         |                                                                                                            |
|------|------------|------------------|-------------------------------------------------------------------------------------|-------------------------|------------------------------------------------------------------------------------------------------------|
| SCZ  | Zhu        | 2020             | Bray-Curtis                                                                         | -                       | sig. different                                                                                             |
| SCZ  | Li         | 2020             | Bray-Curtis                                                                         | PCoA,<br>PERMANOVA      | sig. different                                                                                             |
| SCZ  | Ma         | 2020             | Unweighted Unifrac<br>Weighted Unifrac                                              | PCoA,<br>PERMANOVA      | sig. different<br>no difference                                                                            |
| SCZ  | Zhang      | 2020             | Unweighted Unifrac<br>Weighted Unifrac<br>Bray-Curtis                               | PCoA                    | sig. different<br>sig. different<br>sig. different                                                         |
| SCZ  | Xu         | 2020             | -                                                                                   | NMDS                    | sig. different                                                                                             |
| ANX  | Jiang      | 2018             | UniFrac unweighted                                                                  | PCoA,<br>PERMANOVA      | sig. different                                                                                             |
| ANX  | Chen       | 2019             | Unweighted Unifrac<br>Weighted Unifrac                                              | PCoA                    | sig. different<br>sig. different                                                                           |
| AN   | Kleiman    | 2015             | Unweighted Unifrac<br>Weighted Unifrac                                              | PCoA                    | no sig. difference<br>no sig. difference                                                                   |
| AN   | Mack       | 2016             | Unweighted Unifrac<br>Weighted Unifrac<br>Bray Curtis                               | PCoA                    | sig. different<br>sig. different<br>sig. different                                                         |
| AN   | Mörkl      | 2017             | Unweighted Unifrac<br>Weighted Unifrac                                              | PCoA, ANOSIM,<br>Adonis | sig. different<br>sig. different                                                                           |
| AN   | Borgo      | 2017             | -                                                                                   | RDA, ANOSIM             | no sig. difference                                                                                         |
| AN   | Hanachi    | 2018             | Unweighted Unifrac<br>Weighted Unifrac                                              | PCoA                    | sig. different<br>sig. different                                                                           |
| AN   | Montelione | 2020             | -                                                                                   | NMDS,<br>PERMANOVA      | no sig. difference                                                                                         |
| PTSD | Hemmings   | 2017             | Unweighted Unifrac<br>Weighted Unifrac<br>Bray-Curtis                               | PCoA, ANOSIM            | no sig. difference<br>no sig. difference<br>no sig. difference                                             |
| OCD  | Domenech   | <i>pre-print</i> | Unweighted Unifrac<br>Weighted Unifrac<br>Bray-Curtis<br>Jensen-Shannon<br>Canberra | PCoA,<br>PERMANOVA      | no sig. difference<br>no sig. difference<br>no sig. difference<br>no sig. difference<br>no sig. difference |
| OCD  | Turna      | 2020             | Unweighted Unifrac<br>Weighted Unifrac<br>Bray-Curtis<br>Jaccard                    | PCoA,<br>PERMANOVA      | no sig. difference<br>no sig. difference<br>no sig. difference<br>no sig. difference                       |

PCoA = principal coordinates analysis; PERMANOVA = permutational analysis of variance; PLS-DA = principal least squares discriminant analysis; OPLS-DA = orthogonal principal least squares discriminant analysis; NMDS = non-metric multidimensional scaling

**eAppendix 10. Figures for study-level findings of relative abundance of microbial taxa**

**A. Level: Phylum**

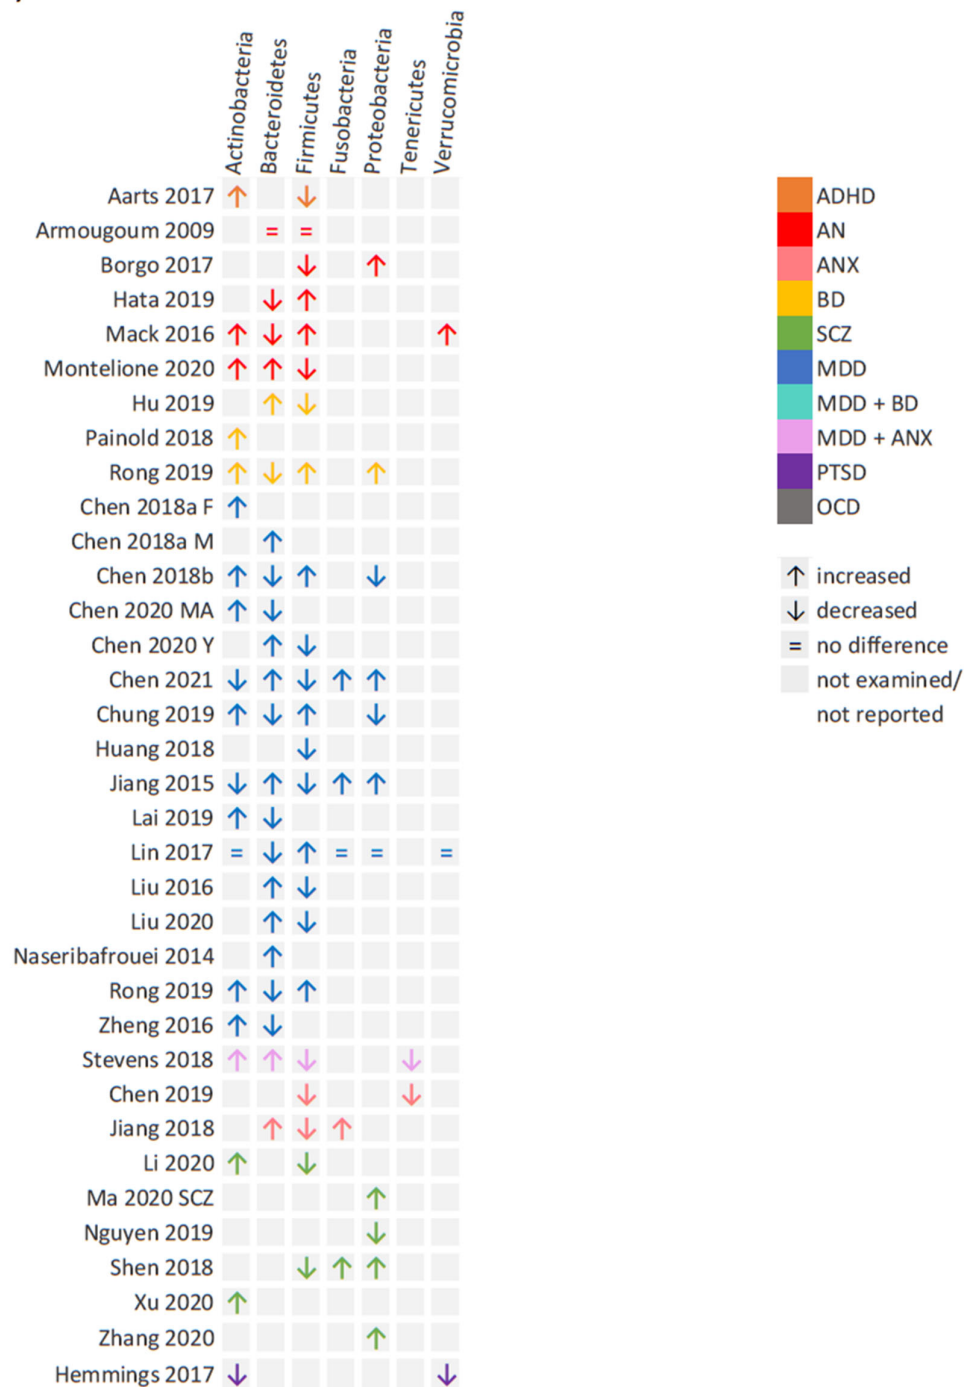

**Figure e10.1. Study-level findings of relative abundance of microbial taxa in patients with psychiatric disorders compared to healthy controls at the: A. Phylum level, B. Family level, C1-2. Genus level.** ADHD= attention deficit hyperactivity disorder, AN= anorexia nervosa, ANX= anxiety, BD= bipolar disorder, MDD= depression, OCD= obsessive compulsive disorder, PTSD= post-traumatic stress disorder, SCZ= psychosis & schizophrenia

**B. Level: Family**

| Phylum:              | Actinobacteria          |                           |                          |                       | Bacteroidetes         |                           |                       |                      | Proteobacteria        |                         |                            |                           |                        |                            | Firmicutes            |                           |                            |                       |                        |                       |                        |                         |                         |                              |                        |                         |                          |                        |
|----------------------|-------------------------|---------------------------|--------------------------|-----------------------|-----------------------|---------------------------|-----------------------|----------------------|-----------------------|-------------------------|----------------------------|---------------------------|------------------------|----------------------------|-----------------------|---------------------------|----------------------------|-----------------------|------------------------|-----------------------|------------------------|-------------------------|-------------------------|------------------------------|------------------------|-------------------------|--------------------------|------------------------|
|                      | <i>Actinomycetaceae</i> | <i>Bifidobacteriaceae</i> | <i>Coriobacteriaceae</i> | <i>Micrococcaceae</i> | <i>Bacteroidaceae</i> | <i>Porphyromonadaceae</i> | <i>Prevotellaceae</i> | <i>Rikenellaceae</i> | <i>Alcaligenaceae</i> | <i>Burkholderiaceae</i> | <i>Desulfovibrionaceae</i> | <i>Enterobacteriaceae</i> | <i>Pasteurellaceae</i> | <i>Succinivibrionaceae</i> | <i>Sutterellaceae</i> | <i>Acidaminococcaceae</i> | <i>Christensenellaceae</i> | <i>Clostridiaceae</i> | <i>Enterococcaceae</i> | <i>Eubacteriaceae</i> | <i>Lachnospiraceae</i> | <i>Lactobacillaceae</i> | <i>Oscillospiraceae</i> | <i>Peptostreptococcaceae</i> | <i>Ruminococcaceae</i> | <i>Streptococcaceae</i> | <i>Turicibacteraceae</i> | <i>Veillonellaceae</i> |
| Aarts 2017           | ↑                       |                           |                          |                       | ↑                     | ↑                         |                       |                      |                       |                         |                            |                           |                        |                            |                       |                           |                            |                       |                        |                       |                        |                         |                         |                              |                        |                         |                          |                        |
| Borgo 2017           |                         |                           |                          |                       |                       |                           |                       |                      |                       |                         | ↑                          |                           |                        |                            |                       |                           |                            |                       |                        |                       |                        |                         |                         |                              |                        | ↓                       |                          |                        |
| Hanachi 2018         |                         |                           |                          |                       |                       |                           |                       |                      |                       |                         | ↑                          |                           |                        |                            |                       |                           |                            |                       |                        |                       |                        |                         |                         | ↓                            |                        |                         |                          |                        |
| Kleiman 2015         |                         | ↑                         |                          |                       |                       |                           |                       |                      |                       |                         |                            |                           |                        |                            |                       |                           |                            |                       |                        |                       |                        |                         |                         |                              |                        |                         |                          |                        |
| Morita 2015          |                         |                           |                          |                       |                       |                           |                       |                      |                       |                         | =                          |                           |                        |                            |                       |                           |                            |                       |                        |                       |                        |                         |                         |                              |                        |                         |                          |                        |
| Mörkl 2017           |                         | ↑                         |                          |                       |                       |                           |                       |                      |                       |                         |                            |                           |                        |                            |                       |                           |                            |                       |                        |                       |                        |                         |                         |                              |                        |                         |                          |                        |
| Painold 2018         |                         | ↑                         |                          |                       |                       |                           |                       |                      |                       |                         |                            |                           |                        |                            |                       |                           |                            |                       |                        |                       |                        |                         |                         |                              | ↓                      |                         |                          |                        |
| Vinberg 2019         |                         |                           |                          |                       |                       |                           |                       |                      |                       |                         |                            |                           |                        |                            |                       | ↓                         |                            |                       |                        |                       |                        |                         |                         |                              |                        |                         |                          |                        |
| Chen 2018a F         | ↑                       | ↑                         |                          |                       |                       |                           |                       |                      |                       |                         |                            | ↑                         |                        |                            |                       |                           |                            |                       | ↑                      | ↑                     |                        |                         |                         |                              |                        |                         |                          |                        |
| Chen 2018a M         |                         | ↓                         |                          |                       | ↑                     |                           |                       |                      |                       |                         |                            |                           |                        |                            |                       |                           |                            | ↓                     |                        |                       |                        |                         |                         |                              |                        |                         |                          |                        |
| Chen 2018b           | ↑                       | ↑                         |                          |                       | ↑                     | ↓                         |                       |                      |                       |                         | ↓                          |                           |                        | ↓                          |                       |                           |                            | ↑                     |                        |                       | ↑                      |                         | ↓                       |                              | ↑                      |                         |                          |                        |
| Chen 2020 MA         | ↓                       | ↓                         |                          |                       | ↑                     | ↑                         |                       |                      |                       |                         |                            |                           | ↑                      | ↑                          |                       |                           |                            |                       | ↓                      | ↓                     |                        |                         |                         |                              |                        |                         | ↓                        |                        |
| Chen 2020 Y          |                         |                           |                          |                       |                       |                           |                       |                      |                       |                         |                            |                           |                        |                            |                       |                           |                            | ↓                     |                        |                       |                        |                         |                         | ↓                            | ↓                      |                         |                          |                        |
| Chen 2021            |                         |                           |                          |                       |                       |                           |                       |                      | ↑                     |                         | ↑                          |                           |                        |                            |                       |                           |                            |                       |                        |                       | ↓                      |                         |                         | ↓                            | ↓                      |                         |                          |                        |
| Chung 2019           | ↑                       |                           |                          |                       | ↑                     | ↓                         |                       | ↓                    |                       |                         |                            |                           |                        |                            |                       |                           |                            |                       |                        |                       | ↑                      |                         |                         | ↑                            |                        | ↑                       |                          |                        |
| Huang 2019           |                         |                           |                          |                       |                       |                           |                       |                      |                       |                         |                            |                           |                        |                            |                       |                           |                            | ↓                     |                        |                       | ↓                      |                         |                         |                              | ↓                      |                         |                          |                        |
| Jiang 2015           |                         |                           |                          |                       | ↓                     | ↑                         | ↓                     | ↑                    |                       |                         | ↑                          |                           |                        |                            | ↑                     |                           |                            |                       |                        |                       | ↓                      |                         |                         |                              | ↓                      |                         |                          | ↓                      |
| Kelly 2016           |                         |                           |                          |                       |                       |                           | ↓                     |                      |                       |                         |                            |                           |                        |                            |                       |                           |                            |                       |                        |                       |                        |                         |                         |                              |                        |                         |                          |                        |
| Lai 2019             | ↑                       | ↑                         | ↑                        | ↓                     |                       |                           |                       |                      |                       |                         |                            |                           |                        |                            | ↑                     |                           |                            |                       | ↑                      |                       |                        | ↑                       | ↑                       |                              |                        |                         |                          | ↑                      |
| Liu 2020             |                         |                           |                          |                       |                       |                           |                       |                      |                       |                         |                            |                           |                        |                            |                       |                           | ↓                          |                       | ↑                      |                       |                        |                         |                         |                              | ↓                      |                         |                          |                        |
| Naseribafrouei 2014  |                         |                           |                          |                       |                       |                           |                       |                      |                       |                         |                            |                           |                        |                            |                       |                           |                            |                       |                        |                       | ↓                      |                         |                         |                              |                        |                         |                          |                        |
| Zheng 2016           |                         |                           |                          |                       | ↓                     |                           |                       | ↓                    |                       |                         |                            |                           |                        |                            | ↓                     | ↓                         |                            |                       |                        | ↑                     |                        | ↑                       |                         |                              |                        | ↑                       |                          | ↓                      |
| Stevens 2018         | ↑                       |                           |                          | ↑                     |                       |                           |                       |                      |                       |                         |                            | ↑                         |                        |                            |                       |                           |                            |                       | ↑                      |                       |                        |                         |                         |                              | ↓                      |                         | ↑                        |                        |
| Chen 2019            |                         |                           |                          |                       | ↑                     | ↓                         |                       |                      | ↑                     |                         | ↑                          |                           | ↓                      |                            |                       |                           |                            |                       |                        |                       |                        |                         |                         |                              | ↓                      |                         |                          |                        |
| Domenech (pre-print) |                         |                           |                          |                       |                       | ↓                         | ↑                     |                      |                       |                         |                            |                           |                        |                            |                       |                           |                            |                       |                        |                       |                        |                         |                         |                              |                        |                         |                          |                        |
| Ma 2020 FEP          |                         |                           |                          |                       |                       |                           |                       |                      |                       |                         | ↑                          | ↓                         | ↓                      |                            |                       | ↑                         |                            |                       |                        |                       |                        |                         |                         | ↓                            |                        |                         | ↓                        | ↓                      |
| Ma 2020 SCZ          |                         |                           |                          |                       |                       |                           |                       |                      |                       |                         | ↑                          | ↓                         |                        |                            |                       | ↑                         |                            |                       | ↑                      |                       |                        | ↑                       |                         |                              |                        |                         | ↓                        |                        |
| Pan 2020             | ↑                       |                           |                          |                       |                       |                           |                       |                      |                       |                         | ↑                          |                           |                        |                            |                       |                           |                            |                       |                        |                       |                        |                         |                         |                              | ↑                      |                         |                          |                        |
| Shen 2018            |                         |                           |                          |                       |                       | ↑                         |                       |                      |                       |                         | ↑                          | ↑                         |                        |                            |                       |                           |                            |                       |                        |                       | ↓                      | ↑                       |                         |                              |                        | ↓                       |                          | ↑                      |
| Schwarz 2018         |                         |                           |                          | ↑                     |                       |                           |                       | ↓                    | ↓                     |                         |                            |                           |                        |                            |                       |                           |                            |                       |                        |                       |                        | ↑                       |                         |                              |                        |                         |                          | ↓                      |
| Xu 2020              |                         |                           |                          |                       |                       |                           | ↓                     | ↓                    |                       |                         |                            |                           |                        |                            |                       |                           |                            |                       | ↓                      |                       |                        |                         |                         |                              |                        |                         |                          |                        |
| Zhang 2020           | ↑                       |                           |                          |                       |                       |                           |                       |                      |                       |                         | ↑                          |                           |                        |                            |                       |                           |                            |                       |                        |                       | ↓                      |                         |                         |                              |                        |                         |                          |                        |
| Zheng 2019           |                         | ↑                         | ↑                        | ↑                     | ↑                     |                           |                       |                      |                       |                         | ↓                          |                           |                        |                            |                       |                           |                            |                       |                        |                       | ↓                      |                         |                         |                              | ↓                      |                         |                          | ↑                      |

**Figure e10.1. Continued**





C2. Level: Genus

| Phylum:              | Actinobacteria     |                        |                  |                    |                    |                  |                |                  |                    |                    | Bacteroidetes          |                       |                   |                   |                      | Proteobacteria              |                    |                     |                   |                   |                       |                   | Other              |                      |                      |                           |
|----------------------|--------------------|------------------------|------------------|--------------------|--------------------|------------------|----------------|------------------|--------------------|--------------------|------------------------|-----------------------|-------------------|-------------------|----------------------|-----------------------------|--------------------|---------------------|-------------------|-------------------|-----------------------|-------------------|--------------------|----------------------|----------------------|---------------------------|
|                      | <i>Actinomyces</i> | <i>Bifidobacterium</i> | <i>Atopobium</i> | <i>Collinsella</i> | <i>Eggerthella</i> | <i>Olsenella</i> | <i>Slackia</i> | <i>Alistipes</i> | <i>Bacteroides</i> | <i>Odoribacter</i> | <i>Parabacteroides</i> | <i>Paraprevotella</i> | <i>Prevotella</i> | <i>Biflophila</i> | <i>Desulfovibrio</i> | <i>Escherichia-Shigella</i> | <i>Citrobacter</i> | <i>Enterobacter</i> | <i>Klebsiella</i> | <i>Salmonella</i> | <i>Parasutterella</i> | <i>Sutterella</i> | <i>Haemophilus</i> | <i>Succinivibrio</i> | <i>Fusobacterium</i> | <i>Methanobrevibacter</i> |
| Aarts 2017           | ↑                  |                        |                  | ↑                  |                    |                  |                |                  |                    | ↑                  | ↑                      |                       |                   |                   |                      |                             |                    |                     |                   |                   |                       |                   |                    |                      |                      |                           |
| Armougom 2009        |                    |                        |                  |                    |                    |                  |                |                  |                    |                    |                        |                       |                   |                   |                      |                             |                    |                     |                   |                   |                       |                   |                    |                      |                      | ↑                         |
| Borgo 2017           |                    |                        |                  |                    |                    |                  |                |                  |                    |                    |                        |                       |                   |                   |                      |                             |                    |                     |                   |                   |                       |                   |                    |                      |                      | ↑                         |
| Hanachi 2018         |                    |                        |                  |                    |                    |                  |                |                  |                    |                    |                        |                       |                   |                   |                      |                             |                    |                     | ↑                 | ↑                 |                       |                   |                    |                      |                      |                           |
| Mack 2016            | ↑                  |                        |                  |                    |                    |                  |                |                  |                    |                    |                        |                       |                   |                   |                      |                             |                    |                     |                   |                   |                       |                   |                    |                      |                      | ↑                         |
| Million 2013         |                    |                        |                  |                    |                    |                  |                |                  |                    |                    |                        |                       |                   |                   |                      |                             |                    |                     |                   |                   |                       |                   |                    |                      |                      | ↑                         |
| Monteleone 2020      |                    |                        |                  |                    |                    |                  |                |                  |                    |                    |                        | ↓                     |                   |                   |                      |                             |                    |                     |                   |                   |                       |                   |                    |                      |                      |                           |
| Morita 2015          | =                  | =                      |                  |                    |                    |                  |                |                  |                    |                    |                        |                       | =                 |                   |                      |                             |                    |                     |                   |                   |                       |                   |                    |                      |                      |                           |
| Aizawa 2018          | =                  |                        |                  |                    |                    |                  |                |                  |                    |                    |                        |                       |                   |                   |                      |                             |                    |                     |                   |                   |                       |                   |                    |                      |                      |                           |
| Evans 2017           | =                  |                        | =                |                    |                    |                  |                | =                | =                  |                    | =                      | =                     |                   |                   |                      |                             |                    |                     |                   |                   | =                     |                   |                    |                      |                      |                           |
| Hu 2019              |                    |                        |                  |                    |                    |                  |                |                  | ↑                  | ↑                  |                        |                       |                   |                   |                      |                             |                    |                     |                   |                   |                       |                   |                    |                      |                      | ↓                         |
| Lai 2021             | ↑                  | ↑                      |                  | ↑                  | ↑                  | ↑                |                | ↓                |                    |                    |                        |                       |                   | ↑                 | ↑                    |                             |                    | ↑                   |                   |                   |                       |                   |                    |                      |                      |                           |
| Lu 2019              | =                  | ↑                      |                  |                    |                    |                  |                |                  |                    |                    |                        |                       |                   |                   |                      |                             |                    | ↑                   |                   |                   |                       |                   |                    |                      |                      |                           |
| Rong 2019            | ↑                  |                        |                  | ↑                  |                    |                  |                | =                | ↑                  | ↓                  | =                      |                       |                   | ↑                 | ↑                    |                             | ↑                  | ↑                   | ↑                 |                   |                       |                   |                    |                      |                      | ↓                         |
| Jiang 2020           |                    |                        |                  |                    |                    |                  |                |                  |                    |                    |                        |                       |                   |                   |                      |                             |                    |                     |                   |                   |                       |                   |                    |                      |                      | ↓                         |
| Aizawa 2016          | ↓                  |                        |                  |                    |                    |                  |                |                  |                    |                    |                        |                       |                   |                   |                      |                             |                    |                     |                   |                   |                       |                   |                    |                      |                      |                           |
| Chen 2018a F         | ↑                  | ↑                      | ↑                |                    | ↑                  | ↑                |                |                  |                    |                    |                        |                       |                   | ↑                 |                      |                             |                    |                     |                   |                   |                       |                   |                    |                      |                      | ↓                         |
| Chen 2018a M         |                    | ↑                      |                  |                    |                    |                  |                |                  | ↑                  |                    |                        |                       |                   |                   |                      |                             |                    |                     |                   |                   |                       |                   |                    |                      |                      |                           |
| Chen 2020 MA         | ↑                  |                        |                  |                    | ↑                  |                  |                |                  |                    |                    |                        |                       |                   |                   |                      |                             |                    |                     |                   |                   |                       |                   |                    |                      |                      | ↓                         |
| Chen 2020 Y          |                    |                        |                  |                    |                    |                  |                |                  | ↓                  |                    |                        |                       |                   |                   |                      |                             |                    |                     |                   |                   |                       |                   |                    |                      |                      |                           |
| Chen 2021            | ↓                  |                        |                  |                    |                    |                  |                |                  |                    |                    |                        | ↑                     |                   |                   | ↑                    |                             |                    |                     |                   |                   |                       |                   |                    |                      |                      |                           |
| Chung 2019           | ↑                  |                        |                  |                    | ↑                  |                  |                |                  |                    |                    |                        | ↑                     | ↓                 |                   |                      |                             |                    |                     |                   |                   |                       |                   |                    |                      |                      | ↓                         |
| Jiang 2015           |                    |                        |                  |                    |                    |                  |                | ↑                | ↓                  |                    | ↑                      | ↓                     |                   |                   |                      |                             |                    |                     |                   |                   | ↑                     |                   |                    |                      |                      |                           |
| Kelly 2016           |                    |                        |                  |                    | ↑                  |                  |                |                  |                    |                    |                        | ↑                     | ↓                 |                   |                      |                             |                    |                     |                   |                   |                       |                   |                    |                      |                      |                           |
| Lai 2019             | ↑                  | ↑                      |                  | ↑                  | ↑                  | ↑                |                | ↓                |                    |                    |                        |                       |                   |                   |                      |                             |                    |                     |                   |                   |                       |                   |                    |                      |                      |                           |
| Lin 2017             |                    |                        |                  |                    |                    |                  |                |                  |                    |                    |                        | ↑                     |                   |                   |                      |                             |                    | ↑                   |                   |                   |                       |                   |                    |                      |                      |                           |
| Liu 2016             | ↓                  |                        | =                |                    |                    |                  |                | ↓                | ↑                  | ↓                  | ↓                      | ↑                     | ↑                 |                   | ↓                    |                             |                    |                     |                   |                   | =                     | ↓                 | ↑                  |                      | ↓                    |                           |
| Liu 2020             |                    |                        |                  |                    |                    |                  |                |                  |                    |                    |                        |                       |                   | ↓                 |                      |                             |                    |                     |                   |                   |                       |                   |                    |                      |                      |                           |
| Naseribafrouei 2014  |                    |                        |                  |                    |                    |                  |                | ↑                |                    |                    |                        |                       |                   |                   |                      |                             |                    |                     |                   |                   |                       |                   |                    |                      |                      |                           |
| Rong 2019            | ↑                  |                        |                  | ↑                  |                    |                  |                | =                | ↑                  | ↓                  | =                      | =                     |                   | ↑                 | =                    |                             | =                  | =                   | =                 | =                 |                       |                   |                    |                      |                      | ↓                         |
| Valles-Colomer 2019  | =                  | =                      |                  | =                  | =                  | =                |                | =                | =                  | ↑                  | =                      | =                     |                   |                   |                      |                             |                    |                     |                   |                   | =                     | =                 |                    |                      |                      |                           |
| Yang 2020            |                    |                        |                  |                    |                    |                  |                |                  | ↑                  |                    |                        |                       |                   |                   |                      |                             |                    |                     |                   |                   |                       |                   |                    |                      |                      |                           |
| Zheng 2016           |                    |                        |                  | ↑                  | ↑                  |                  |                | ↓                |                    |                    |                        |                       |                   |                   |                      |                             |                    |                     |                   |                   |                       |                   |                    |                      |                      |                           |
| Stevens 2019         | ↑                  |                        |                  | ↑                  |                    |                  |                |                  |                    |                    |                        |                       |                   |                   |                      |                             |                    |                     |                   |                   |                       |                   |                    |                      |                      |                           |
| Chen 2019            |                    |                        |                  |                    |                    |                  |                |                  | ↑                  |                    |                        | ↓                     |                   |                   | ↑                    |                             |                    |                     |                   |                   |                       |                   |                    |                      |                      |                           |
| Jiang 2018           |                    |                        |                  |                    |                    |                  |                |                  | ↑                  |                    |                        |                       |                   |                   | ↑                    |                             |                    |                     |                   |                   |                       |                   |                    |                      |                      | ↑                         |
| Domenech (pre-print) |                    |                        |                  |                    |                    |                  |                | ↑                |                    |                    |                        |                       |                   |                   |                      |                             |                    |                     |                   |                   |                       |                   |                    |                      |                      |                           |
| Turna 2020           |                    |                        |                  |                    |                    |                  |                |                  | ↓                  |                    |                        |                       |                   |                   |                      |                             |                    |                     |                   |                   |                       |                   |                    |                      |                      |                           |
| Li 2020              |                    |                        |                  | ↑                  |                    |                  |                |                  |                    |                    |                        |                       |                   |                   |                      |                             |                    |                     |                   |                   |                       |                   |                    |                      |                      | ↑                         |
| Ma 2020 FEP          |                    |                        |                  |                    |                    |                  |                |                  |                    |                    |                        |                       |                   |                   | ↑                    |                             |                    |                     |                   |                   |                       |                   |                    |                      |                      | ↓                         |
| Ma 2020 SCZ          |                    |                        |                  |                    |                    |                  |                |                  | ↓                  | ↓                  |                        |                       |                   |                   | ↑                    |                             | ↑                  |                     |                   |                   |                       |                   |                    |                      |                      |                           |
| Nguyen 2019          |                    |                        |                  |                    |                    |                  |                |                  |                    |                    |                        |                       |                   |                   |                      |                             |                    |                     |                   |                   |                       |                   | ↓                  | ↓                    |                      |                           |
| Pan 2020             | ↑                  |                        |                  |                    |                    |                  |                |                  |                    |                    |                        |                       | ↑                 |                   |                      |                             |                    |                     |                   |                   |                       |                   |                    |                      |                      |                           |
| Shen 2018            |                    |                        |                  | ↑                  |                    |                  |                |                  |                    |                    |                        | ↑                     | ↑                 | ↑                 | ↑                    | ↑                           | ↑                  |                     |                   |                   |                       |                   |                    | ↑                    | ↑                    |                           |
| Xu 2020              |                    |                        |                  |                    | ↑                  |                  |                |                  |                    |                    |                        |                       |                   |                   |                      |                             |                    |                     |                   |                   |                       |                   |                    |                      |                      |                           |
| Yuan 2018            |                    | ↓                      |                  |                    |                    |                  |                |                  | =                  |                    |                        |                       |                   |                   | ↓                    |                             |                    |                     |                   |                   |                       |                   |                    |                      |                      |                           |
| Zhang 2020           | ↑                  |                        |                  |                    | ↑                  |                  |                |                  |                    |                    |                        | ↑                     | ↑                 |                   |                      |                             |                    |                     |                   |                   | ↑                     |                   |                    |                      |                      |                           |
| Zhu 2020             | ↑                  |                        |                  |                    |                    |                  |                |                  |                    |                    |                        |                       |                   |                   |                      |                             |                    |                     |                   |                   |                       |                   |                    |                      |                      | ↑                         |

Figure e10.1. Continued
